# Supplementary material
Source: PubMed Central journal article supplement (PMC3945014)
Supplement: mmc2.pdf [file mmc2.pdf]

## The Berg-Purcell Limit Revisited

Kazunari Kaizu,<sup>†</sup> Wiet de Ronde,<sup>‡</sup> Joris Pajmans,<sup>‡</sup> Koichi Takahashi,<sup>†</sup> Filipe Tostevin,<sup>‡</sup> and Pieter Rein ten Wolde<sup>†\*</sup>

<sup>†</sup>RIKEN Quantitative Biology Center (QBIC), RIKEN, 6-2-3 Furuedai, Suita, Osaka 565-0874, Japan; and <sup>‡</sup>FOM Institute AMOLF, Science Park 104, 1098 XG, Amsterdam, The Netherlands

**ABSTRACT** Biological systems often have to measure extremely low concentrations of chemicals with high precision. When dealing with such small numbers of molecules, the inevitable randomness of physical transport processes and binding reactions will limit the precision with which measurements can be made. An important question is what the lower bound on the noise would be in such measurements. Using the theory of diffusion-influenced reactions, we derive an analytical expression for the precision of concentration estimates that are obtained by monitoring the state of a receptor to which a diffusing ligand can bind. The variance in the estimate consists of two terms, one resulting from the intrinsic binding kinetics and the other from the diffusive arrival of ligand at the receptor. The latter term is identical to the fundamental limit derived by Berg and Purcell (Biophys. J., 1977), but disagrees with a more recent expression by Bialek and Setayeshgar. Comparing the theoretical predictions against results from particle-based simulations confirms the accuracy of the resulting expression and reaffirms the fundamental limit established by Berg and Purcell.

### INTRODUCTION

The evidence is accumulating that sensory systems in biology often operate near the fundamental limit set by the noise of counting signal molecules. Receptors in our visual system can detect single photons (1), some animals can smell single molecules (2), swimming bacteria can respond to the binding and unbinding of only a limited number of molecules (3,4), and eukaryotic cells can respond to a difference in ~10 molecules between the front and the back of the cell (5). Recent experiments suggest that the precision of the embryonic development of the fruitfly *Drosophila* is close to the limit set by the available number of regulatory proteins (6–8). This raises the question of what is the fundamental limit to the precision of chemical concentration measurements.

In their classic article, Berg and Purcell (3) considered a scenario in which a cell measures the concentration  $c$  of a ligand by monitoring the occupation state of the receptor molecules to which the ligand molecules bind and unbind. A central result is the precision with which the ligand concentration  $c$  can be inferred from the time-averaged occupancy of a single receptor. The analysis of Berg and Purcell predicts that in the limit at which the integration time  $T$  is much longer than the correlation time of the receptor state, the expected uncertainty in the time-averaged occupancy resulting from the random nature of diffusion is given by

$$\frac{\delta n}{\bar{n}} = \sqrt{\frac{(1 - \bar{n})}{2D\sigma cT}}, \quad (1)$$

where  $\bar{n}$  is the true mean occupancy,  $\sigma$  is the receptor-ligand binding cross section, and  $D$  is the diffusion constant of the ligand. The uncertainty or expected error in a corresponding estimate of the concentration is related to the noise in the observed occupancy via the gain  $d\bar{n}/dc$ ,

$$\delta c = \frac{dc}{d\bar{n}} \delta n, \quad (2)$$

yielding Berg and Purcell's expression for the limit to the precision of concentration measurements by a single receptor (see Eq. 52 in Berg and Purcell (3)):

$$\frac{\delta c}{c} = \sqrt{\frac{2}{4D\sigma c(1 - \bar{n})T}}. \quad (3)$$

This result can be understood intuitively by noting that  $4D\sigma c$  is the flux of ligand molecules arriving at the receptor and  $1 - \bar{n}$  is the probability that the receptor is free (3). Therefore,  $4D\sigma c(1 - \bar{n})$  is the effective rate of ligand binding if every collision between ligand and free receptor leads to successful binding. Berg and Purcell (3) argue that their result also holds for reactions that are not deeply in the diffusion-limited regime. After an unsuccessful receptor-ligand encounter, they argue, the ligand will rapidly collide with the receptor again and again until it binds the receptor, and these rounds of encounters can be captured by renormalizing  $\sigma$ .

The argument of Berg and Purcell ignores, however, that after an unsuccessful collision with the receptor the ligand molecule may diffuse back into the bulk, and a different ligand molecule may subsequently bind. Moreover, a ligand molecule that has just dissociated from the receptor may

Submitted September 22, 2013, and accepted for publication December 19, 2013.

\*Correspondence: [tenwolde@amolf.nl](mailto:tenwolde@amolf.nl)

Editor: Sean Sun.

© 2014 by the Biophysical Society  
0006-3495/14/02/0976/10 \$2.00

<http://dx.doi.org/10.1016/j.bpj.2013.12.030>

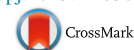

rapidly rebind, or it may diffuse away from the receptor into the bulk. It thus remains unclear to what extent the result of Berg and Purcell applies to binding reactions that are not diffusion-limited.

Bialek and Setayeshgar (9) sought to generalize the result of Berg and Purcell by taking into account ligand-receptor binding dynamics. They considered a model in which the ligand molecules can diffuse, bind the receptor upon contact with an intrinsic association rate  $k_a$ , and unbind from the receptor with an intrinsic dissociation rate  $k_d$ . Invoking the fluctuation-dissipation theorem, they linearized the nonlinear reaction-diffusion equation, to obtain the following result for the fractional uncertainty in the estimate for the concentration (Eq. 32 in (9)):

$$\frac{\delta c}{c} = \sqrt{\frac{1}{\pi D \sigma c T} + \frac{2}{k_a c (1 - \bar{n}) T}} \quad (4)$$

The first term arises from the stochastic arrival of the ligand molecules at the receptor by diffusion, whereas the second term is due to the intrinsic stochasticity of the binding kinetics of the receptor. Indeed, even in the limit that  $D \rightarrow \infty$ , such that the concentration at the receptor is constant, this concentration can still not be measured with infinite precision because the receptor stochastically switches between the bound and unbound states, leading to noise in the estimate of the receptor occupancy. This term is absent in Eq. 3 because Berg and Purcell assume that the binding reaction is fully diffusion-limited, meaning that the intrinsic rates  $k_a$  and  $k_d$  go to infinity.

The first term of Eq. 4 should be compared with Eq. 3. This term is considered to be the fundamental limit to the accuracy of measuring chemical concentrations via a single receptor, because it presents a noise floor that is solely due to the physics of diffusion, independent of the binding kinetics (9). Indeed, in the limit that the reaction is diffusion-limited, the second term in Eq. 4 is zero, and both theories should yield the same result. However, it is clear that in addition to the geometrical factor  $\pi$  (which comes from the fact that Berg and Purcell model the receptor as a reactive disk, whereas Bialek and Setayeshgar take the receptor to be a spherical particle), the expressions differ by a factor  $1/(2(1 - \bar{n}))$ . This difference can have marked implications. Although the Bialek-Setayeshgar expression predicts that the uncertainty remains bounded even in the limit that  $\bar{n} \rightarrow 1$ , the Berg-Purcell expression suggests that it diverges in this limit.

Here, we rederive the limit to the accuracy of sensing via a single receptor (10), borrowing heavily from the work of Agmon and Szabo (11) on diffusion-influenced reactions. Our expression is identical to that of Berezhkovskii and Szabo (12), who have recently independently derived this limit for an arbitrary number of receptors, when there is one receptor. Like the expression of Bialek and Setayeshgar

(Eq. 4), our expression consists of two terms: One term describes the effect of the diffusive transport of the ligand molecules to and from the receptor, and the other describes the effect of the intrinsic binding and unbinding kinetics of the receptor. Although the second term agrees with that of Bialek and Setayeshgar, the first does not agree with their expression but does agree with the expression of Berg and Purcell (again apart from the geometric factor).

We then perform extensive tests of these expressions by performing particle-based simulations using Green's function reaction dynamics (GFRD), which is an exact scheme for simulating reaction-diffusion systems at the particle level (13–15). The simulation results agree very well with our expression and that of Berezhkovskii and Szabo (12) for the full range of conditions that we considered, which spans the biologically relevant regime. This means that the Berg-Purcell limit is the most accurate expression for the fundamental limit to measuring chemical concentrations.

We end by examining the assumptions of our theory under biologically relevant conditions. This naturally suggests a simple but intuitive model. This model not only explains the origin of the factor  $1/(2(1 - \bar{n}))$  in the Berg-Purcell expression, but also shows how their expression can be generalized to reactions that are not diffusion-limited by integrating out the rapid rebindings of dissociated molecules. The model also elucidates that rebindings do not contribute to the accuracy of sensing, because their likelihood does not depend on the concentration.

## METHODS AND THEORY

We consider a single receptor  $A$  in a volume  $V$  that is surrounded by a large number  $N_B$  of noninteracting ligand molecules  $B$  at concentration  $c = N_B/V$ . We consider the pseudo first-order limit, meaning that  $N_B \gg N_A = 1$  and  $V \rightarrow \infty$ . Without loss of generality, we may assume that the receptor is static and located at the origin, while the ligand molecules diffuse with diffusion constant  $D$ . A ligand molecule can bind a free receptor with an intrinsic association rate  $k_a$  when the two come in contact at the contact distance  $\sigma$ , which is the sum of the radii of the two respective molecules. A bound ligand molecule can dissociate from the receptor with an intrinsic dissociation rate  $k_d$ . The state of the receptor is denoted by the binary variable  $n(t)$ , which is one if the receptor is bound to a ligand at time  $t$  and zero otherwise. We note that this model is identical to that of Bialek and Setayeshgar (9) for the scenario of a single receptor molecule.

Following Berg and Purcell (3) and Bialek and Setayeshgar (9), we imagine that the cell estimates the concentration  $c$  from the receptor occupancy  $n(t)$  integrated over an integration time  $T$ ,  $n_T = T^{-1} \int_0^T n(t) dt$ . In the limit that the integration time  $T$  is much longer than the correlation time of  $n(t)$ ,  $\tau_n$ , the variance in our estimate  $n_T$  of the true mean occupancy  $\bar{n}$  is given by

$$(\delta n)^2 \approx \frac{2\sigma_n^2 \tau_n}{T} = \frac{P_n(\omega = 0)}{T} = \frac{2\text{Re}[\widehat{C}_n(s = 0)]}{T}, \quad (5)$$

where  $\sigma_n^2 = \langle n^2 \rangle - \langle n \rangle^2 = \bar{n}(1 - \bar{n})$  is the instantaneous variance and  $P_n(\omega)$  and  $\widehat{C}_n(s)$  are, respectively, the power spectrum and the Laplace transform of the correlation function  $C_n(t)$  of  $n(t)$ . The uncertainty in the estimate for the concentration  $c$  can then be obtained from Eqs. 2 and 5. In Eq. 2, the

gain is  $dc/d\bar{n} = c/(\bar{n} - \bar{n}^2)$ , because  $\bar{n} = c/(c + K_D)$  with  $K_D$  the receptor-ligand dissociation constant.

The correlation function of any binary switching process is given by

$$C_n(\tau) = p_*^0 \left( p_{*|*}(\tau) - p_*^0 \right), \quad (6)$$

where  $p_*^0 \equiv \bar{n}$  is the equilibrium probability for the bound state ( $*$ ) and  $p_{*|*}(\tau) = \langle n(\tau)n(0) \rangle / \bar{n}$  is the probability the receptor is bound at  $t = \tau$ , given it was bound at  $t = 0$ . To obtain the correlation function, we thus need  $p_{*|*}(\tau)$ . It is convenient to focus on the conjugate probability

$$\mathcal{P}_{\text{rev}}(t|*) = 1 - p_{*|*}(t), \quad (7)$$

which is the probability that the receptor is free at time  $t$  given that it was bound at  $t = 0$ . Following Agmon and Szabo (11), we use the subscript “rev” to indicate that we consider a reversible reaction, meaning that in between  $t = 0$  and  $t$  the receptor may bind and unbind ligand a number of times. The probability that a receptor-ligand pair dissociates between  $t'$  and  $t' + dt'$  to form an unbound pair at contact is  $k_d[1 - \mathcal{P}_{\text{rev}}(t'|*)]dt'$ , whereas the probability that the free receptor with a ligand molecule at contact at time  $t'$  is still unbound at time  $t > t'$  is  $\mathcal{P}_{\text{rad}}(t - t'|\sigma)$ . The subscript “rad” means that we now consider an irreversible reaction ( $k_d = 0$ ), which can be obtained by solving the diffusion equation using a radiation boundary condition (11). Hence,  $\mathcal{P}_{\text{rev}}(t|*)$  is given by (11)

$$\mathcal{P}_{\text{rev}}(t|*) = k_d \int_0^t [1 - \mathcal{P}_{\text{rev}}(t'|*)] \mathcal{P}_{\text{rad}}(t - t'|\sigma) dt'. \quad (8)$$

We emphasize that up to this point no approximation has been made. The question now is what is  $\mathcal{P}_{\text{rad}}(t|\sigma)$ , which is the quantity needed to solve Eq. 8. To address this, we introduce two new quantities:

1.  $\mathcal{P}_{\text{rad}}(t|\text{eq})$ , which is the probability that a receptor initially is free and surrounded by an equilibrium distribution of ligand molecules, and it remains free until at least a later time  $t$ ; and
2.  $S_{\text{rad}}(t|\sigma)$ , which is the probability that a free receptor initially surrounded by only one single ligand molecule at contact is still unbound at a later time  $t$ .

The quantity  $S_{\text{rad}}(t|\sigma)$  thus refers to a system consisting of a receptor with only one ligand molecule, which initially is at contact with the receptor, whereas  $\mathcal{P}_{\text{rad}}(t|\sigma)$  refers to a system of a receptor with  $N_B \geq 1$  ligand molecules, one of which is at contact initially.

In general, it is not possible to obtain an exact analytical expression for  $\mathcal{P}_{\text{rad}}(t|\sigma)$ , the quantity that we need (Eq. 8). To illustrate this, imagine a bound receptor-ligand pair that is surrounded by an equilibrium, i.e., a statistically uniform distribution of ligand particles. When this receptor-ligand pair dissociates to form a receptor-ligand pair at contact surrounded by an equilibrium distribution of ligand molecules, then the probability that the receptor is still unbound at a later time  $t$  is given by (11)

$$\mathcal{P}_{\text{rad}}(t|\sigma) = \mathcal{P}_{\text{rad}}(t|\text{eq}) S_{\text{rad}}(t|\sigma). \quad (9)$$

Now, the ligand molecule at contact may either rebind the receptor or diffuse away from it. If it rebinds the receptor, then after the next dissociation event, the probability that the receptor will remain free for at least another time  $t$  will again be given by Eq. 9. Equation 9 breaks down when the ligand molecule at contact instead diffuses away from the receptor and another ligand molecule binds the receptor before the first ligand has relaxed to equilibrium. Indeed, the process of receptor binding generates nontrivial spatio-temporal correlations between the positions of the ligand molecules, which depend on the history of the association and dissociation events. This impedes an exact solution of the problem. However, if the dissociation rate  $k_d$  is low then it becomes reasonable to assume that after

each dissociation event, the unbound receptor-ligand pair at contact is surrounded by an equilibrium distribution of ligand (11), in which case the survival probability is given by Eq. 9. This is the crucial assumption that we make in our analysis.

With the assumption of Eq. 9, Eq. 8 can now be solved. For a pseudo-first-order irreversible reaction with a static target,  $\mathcal{P}_{\text{rad}}(t|\text{eq})$  of Eq. 9 is given by Rice (16) (see also the Supporting Material) as

$$\mathcal{P}_{\text{rad}}(t|\text{eq}) = e^{-c \int_0^t k_{\text{rad}}(t') dt'}, \quad (10)$$

where  $k_{\text{rad}}(t)$  is the time-dependent rate coefficient. Here,  $ck_{\text{rad}}(t)$  is the rate at which ligand molecules will bind a free receptor at time  $t$ , given that the ligand distribution at time  $t = 0$  was the uniform, equilibrium, distribution. As before, the subscript “rad” refers to a radiation boundary condition, meaning that if a ligand molecule and the receptor come into contact, they react with a finite rate  $k_a$  (11). The quantity  $S_{\text{rad}}(t|\sigma)$  in Eq. 9 is via detailed balance (and the backward Smoluchowski equation) related to  $k_{\text{rad}}(t)$ :  $k_{\text{rad}}(t) = k_a S_{\text{rad}}(t|\sigma)$  (11) (see also the Supporting Material). Together, these relations yield a simple expression for the Laplace transform of  $\mathcal{P}_{\text{rad}}(t|\sigma)$  in terms of the Laplace transform  $\hat{\mathcal{P}}_{\text{rad}}(s|\text{eq})$  of  $\mathcal{P}_{\text{rad}}(t|\text{eq})$  (see the Supporting Material). Substituting this in the solution of Eq. 8 in the Laplace domain allows us to obtain the following expression for the Laplace transform of the correlation function in terms of  $\hat{\mathcal{P}}_{\text{rad}}(s|\text{eq})$  (see the Supporting Material):

$$\hat{C}_n(s) = \sigma_n^2 \frac{ck_a \tau_c \hat{\mathcal{P}}_{\text{rad}}(s|\text{eq})}{1 - k_d \tau_c s \hat{\mathcal{P}}_{\text{rad}}(s|\text{eq})}, \quad (11)$$

where  $\tau_c = (k_a c + k_d)^{-1}$  is the correlation time of the intrinsic receptor switching dynamics, i.e., the correlation time of the receptor occupancy when receptor-ligand association is reaction-limited and the effect of diffusion can be neglected.

To obtain an analytically closed form for the correlation function, we require an expression for  $\hat{\mathcal{P}}_{\text{rad}}(s|\text{eq})$ . We use

$$s \hat{\mathcal{P}}_{\text{rad}}(s|\text{eq}) \approx (1 + c \hat{k}_{\text{rad}}(s))^{-1}, \quad (12)$$

which correctly captures the short- and long-time limit of  $\mathcal{P}_{\text{rad}}(t|\text{eq})$  (11) (see the Supporting Material). We exploit that

$$\hat{k}_{\text{rad}}(s) = k_a \hat{k}_{\text{abs}}(s) / (k_a + s \hat{k}_{\text{abs}}(s))$$

(see the Supporting Material), where

$$\hat{k}_{\text{abs}}(s) = 4\pi\sigma D \left( 1 + \sigma \sqrt{s/D} \right) / s$$

is the Laplace transform of the time-dependent diffusion-limited rate constant  $k_{\text{abs}}(t)$  (16). Here, the subscript “abs” refers to the absorbing boundary condition, meaning that  $k_a \rightarrow \infty$ , where each ligand-receptor collision will immediately lead to binding;  $ck_{\text{abs}}(t)$  is thus the rate at which ligand molecules collide and associate with the receptor at time  $t$ , given that they start from the equilibrium (uniform) distribution. Substituting Eq. 12 in Eq. 11 yields (see the Supporting Material)

$$\hat{C}_n(s) = \sigma_n^2 \frac{\tau'_c(s)}{s \tau'_c(s) + 1}, \quad (13)$$

where  $\tau'_c(s)$  is the intrinsic correlation time  $\tau_c$  renormalized by the concentration fluctuations (9),

$$\tau_c'(s) = \tau_c(1 + \Sigma(s)); \Sigma(s) = \frac{k_a}{k_D(1 + \sqrt{s\tau_m})}, \quad (14)$$

with the diffusion-limited rate constant  $k_D = k_{\text{abs}}(t \rightarrow \infty) = 4\pi\sigma D$  and the molecular timescale  $\tau_m = \sigma^2/D$ . The correlation time  $\tau_n$  of the receptor is then given by  $\tau_n = (\sigma_n^2)^{-1} \widehat{C}_n(s=0)$  (Eq. 5) as

$$\tau_n = \frac{1}{k_{\text{on}}c + k_{\text{off}}}, \quad (15)$$

where  $k_{\text{on}}$  and  $k_{\text{off}}$  are the renormalized association and dissociation rates

$$k_{\text{on}} = \left( \frac{1}{k_a} + \frac{1}{k_D} \right)^{-1} = \frac{k_a k_D}{k_a + k_D}, \quad (16)$$

$$k_{\text{off}} = \left( \frac{1}{k_d} + \frac{K_{\text{eq}}}{k_D} \right)^{-1} = \frac{k_d k_D}{k_a + k_D}, \quad (17)$$

and  $K_{\text{eq}} = k_a/k_d = K_D^{-1}$  is the equilibrium constant (11). The effective association rate  $k_{\text{on}}$  is the long-time limit of the time-dependent rate coefficient  $k_{\text{rad}}(t)$ :  $k_{\text{on}} = k_{\text{rad}}(t \rightarrow \infty)$ ; it takes into account the finite rate of diffusion and the finite probability of binding when receptor and ligand are at contact. Similarly,  $k_{\text{off}}$  is the effective rate at which a ligand dissociates from the receptor and diffuses into the bulk. Our simple coarse-grained model presented below (see Results) gives an intuitive derivation of these effective rate constants.

The uncertainty in the estimate of the concentration can be obtained by combining Eq. 13 with Eqs. 2 and 5, yielding our principal result

$$\frac{\delta c}{c} = \sqrt{\frac{1}{2\pi\sigma D c(1-\bar{n})T} + \frac{2}{k_a c(1-\bar{n})T}}. \quad (18)$$

The first term describes the uncertainty in the estimate of  $c$  that stems from the stochastic diffusive arrival of the ligand molecules, whereas the second term describes variability that results from the intrinsic binding dynamics of the receptor. If the receptor-ligand association reaction is fully reaction-limited, i.e.,  $k_a k_d \rightarrow 0$  or  $D \rightarrow \infty$ , then the uncertainty in the concentration estimate is dominated by the latter term. Conversely, if the reaction is diffusion-limited,  $k_a k_d \rightarrow \infty$  or  $D \rightarrow 0$ , then the first term dominates the uncertainty, which is limited by the diffusive arrival and departure of the ligand molecules to and from the receptor.

It is clear that the second term in Eq. 18 is identical to that in the expression of Bialek and Setayeshgar (9), Eq. 4. Yet, the first term, which determines the fundamental limit, is different: the expression of Bialek and Setayeshgar misses a factor  $1/(2(1-\bar{n}))$ . The Berg-Purcell expression does contain this factor, and indeed, apart from a geometrical factor, our expression is identical to theirs in the limit that the reaction is fully diffusion-limited.

## RESULTS

### Simulation results

To test our theory, we have performed particle-based simulations. A key quantity of our theory is  $\widehat{C}_n(s)$ , Eq. 13, because the precision of our concentration estimate directly follows from this quantity and the gain  $d\bar{n}/dc$  (see Eqs. 2 and 5). We therefore compare the power spectrum,

$$P_n(\omega) = 2\text{Re}[\widehat{C}_n(s = i\omega)]$$

with  $\widehat{C}_n(s)$  given by Eq. 13, to that obtained from simulations. The simulation scheme should not only describe the diffusive transport at large length and timescales, but also capture the (re)binding dynamics at short scales. Moreover, to obtain an accurate estimate for the zero-frequency limit of the power spectrum, which is computationally challenging, the scheme should also be efficient. We have therefore employed Green's function reaction dynamics (GFRD) (13,15,17). Like Brownian dynamics (overdamped Langevin dynamics), GFRD simulates reaction-diffusion systems at the particle level; in essence, both are numerical procedures for solving the Smoluchowski equation (17). However, while Brownian dynamics uses a fixed time-step to propagate the particles, GFRD is an asynchronous, event-driven kinetic Monte Carlo scheme.

The central idea of GFRD is to decompose the many-body reaction-diffusion problem, which cannot be solved analytically, into sets of one- and two-body problems that can be solved analytically using Green's functions (13,17). In the recent version of GFRD, this decomposition is performed by putting single particles and pairs of particles in mathematical domains (18), for which the reaction-diffusion problem can be solved exactly (15). This yields for each domain an event-type, which is either a reaction or a particle leaving the domain, and an event-time, which is when this event will happen. These events are then executed in chronological order. Importantly, the mathematical domains are nonoverlapping, which means that the stochastic reaction-diffusion processes of the respective domains are independent. This makes GFRD an exact scheme for simulating reaction-diffusion problems at the particle level (15). Because the scheme is event-driven, it is also very fast: at the concentrations considered here, GFRD is up to 4–6 orders-of-magnitude faster than Brownian dynamics (13,15) (for more details, see [www.GFRD.org](http://www.GFRD.org)). For this study, we exploited the spherical symmetry of the system and that the ligand molecules only interact with the receptor, but not among themselves.

The computational model is identical to that of our theory, albeit in a finite volume. It consists of a static single receptor in the center of a spherical simulation box with diameter  $L$ , surrounded by ligand molecules that diffuse with diffusion constant  $D$ . A ligand molecule that is in contact with a free receptor at the contact distance  $\sigma$  can associate with the receptor with an intrinsic association rate  $k_a$  and then dissociate from it with an intrinsic dissociation rate  $k_d$ ; after dissociation, the ligand molecule is put at contact.

Fig. 1 shows the power spectra as obtained from the simulations (black circles) together with the prediction of our theory (solid red line; Eq. 13), for  $\bar{n} = 0.5$  and  $c = 0.4 \mu\text{M}$ . In the Supporting Material, we show results for

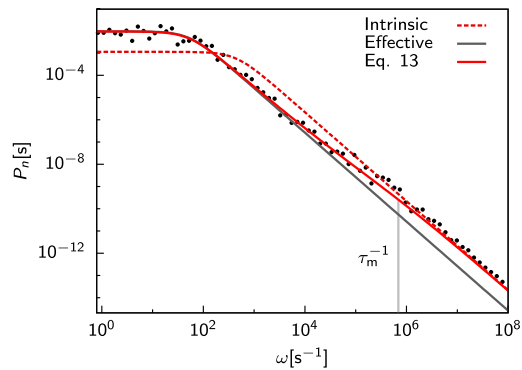

FIGURE 1 The power spectrum of the receptor state  $P_n(\omega)$  for  $c = 0.4 \mu\text{M}$ . The simulation results (black circles) agree well with the theoretical prediction of Eq. 13 (solid red line). At high frequencies  $\omega > 1/\tau_m = D/\sigma^2$ , the effect of diffusion is negligible and the receptor dynamics is that of a Markovian switching process with intrinsic rates  $k_{ac}$  and  $k_d$  (dashed red line), while at low frequencies it is that of a Markovian switching process with effective rates  $k_{onc}$  and  $k_{off}$ , respectively (solid gray line). The zero-frequency limit determines the precision of the concentration estimate. Parameters:  $\bar{n} = 0.5$ ,  $D = 1 \mu\text{m}^2 \text{s}^{-1}$ ,  $\sigma = 10 \text{ nm}$ ,  $L = 1 \mu\text{m}$ , and  $k_a = 552 \mu\text{M}^{-1} \text{s}^{-1}$ . To see this figure in color, go online.

higher concentrations. The parameters have been chosen such that they are biologically meaningful, yet bring the system in the diffusion-limited regime—this makes it possible to probe the fundamental limit set by diffusion. Specifically, the diffusion constant  $D = 1 \mu\text{m}^2/\text{s}$  is comparable to that of intracellular proteins (19,20).

Fig. 1 shows that the agreement between theory and simulation is very good over essentially the full frequency range. The high-frequency regime corresponds to the intrinsic switching dynamics of the receptor. In this regime, diffusion hardly plays any role and the receptor dynamics is dominated by the binding of ligand molecules that are essentially in contact with the receptor; consequently, the power spectrum is well approximated by that of a binary switching process with uncorrelated exponentially distributed waiting times with the intrinsic correlation time  $\tau_c = (k_{ac} + k_d)^{-1}$  (red dashed line). The theory also accurately describes the intermediate frequency regime, which starts at  $\omega_m = 1/\tau_m = D\sigma^2$ . In this regime a ligand molecule, after dissociation from the receptor, manages to diffuse away from the receptor over a few molecular distances  $\sigma$ , but then rebinds the receptor before another ligand molecule from the bulk does. The low-frequency regime of the power spectrum corresponds to the regime in which, after receptor dissociation, the ligand molecule diffuses into the bulk and, most likely, another molecule from the bulk binds the receptor. In this regime, the spectrum is well approximated by that of a memoryless switching process with the same effective correlation time as that of our theory,  $\tau_n = \tau'_c(s=0) = (k_{onc} + k_{off})^{-1}$  (gray solid line).

The most important point of the power spectrum is at zero-frequency,  $P_n(\omega = 0)$ , because this determines the correlation time of the receptor and hence the uncertainty

in our estimate of the average receptor occupancy  $\bar{n}$  and the concentration  $c$ , following Eqs. 2 and 5. Fig. 2 shows  $P_n(\omega = 0)$  as a function of the average receptor occupancy  $\bar{n}$  at a concentration of  $0.4 \mu\text{M}$ . (For higher concentrations, see the Supporting Material.) It is seen that the agreement between the theory and simulations is excellent. Fig. 2 also shows the prediction of Bialek and Setayeshgar for  $P_n(\omega = 0)$  (9). Although their analysis predicts that  $P_n(\omega = 0) = P_{1-n}(\omega = 0)$ , our results show that the dependence of  $P_n(\omega)$  on  $n$  is nonsymmetric, which reflects the fact that if the receptor is free more often, more binding events can be counted, leading to a more accurate estimate of the concentration. Because the Berg-Purcell formula in Eq. 3 directly follows from our expression for  $P_n(\omega = 0) = 2\text{Re}[\hat{C}_n(s=0)]$ , via Eqs. 2, 5, and 13, we conclude that the Berg-Purcell limit provides an accurate upper bound on the precision with which chemical concentrations can be measured.

### Validity of assumptions under biological conditions

The central assumption of our theory is Eq. 9, which states that after dissociation the unbound receptor-ligand pair is surrounded by a uniform distribution of ligand molecules. This assumption breaks down when the following conditions apply:

#### Condition 1

After receptor dissociation, the rebinding of the ligand molecule to the receptor is preempted by the receptor binding of another, second, ligand molecule.

#### Condition 2

This second ligand molecule dissociates from the receptor before the first has diffused into the bulk.

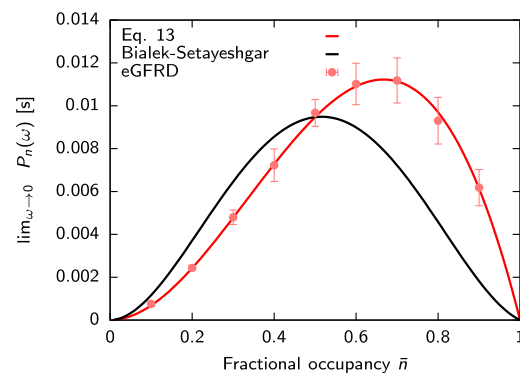

FIGURE 2 The zero-frequency limit of the power spectrum as a function of the average receptor occupancy  $\bar{n}$  for  $c = 0.4 \mu\text{M}$ ;  $\bar{n}$  is varied by changing  $k_d$ . It is seen that the agreement between the theoretical prediction of Eq. 13 and the simulation results is very good (red line). In contrast, the prediction of Bialek and Setayeshgar (9) (black line) differs markedly from our results. Parameters: see Fig. 1. To see this figure in color, go online.

We argue that under biologically relevant conditions, neither condition arises and, therefore, the key assumption of our analysis holds.

A rebinding trajectory of a ligand molecule that has just dissociated from the receptor is very short on the timescale at which molecules arrive from the bulk at the concentrations considered here (see Fig. S1 in the Supporting Material). Consequently, the likelihood that another molecule interferes with such a rebinding event is negligible (see Fig. S3); a dissociated ligand molecule rebinds the receptor before it diffuses into the bulk as often as when it was the only ligand molecule present in the system. Condition 1 is thus not met and the central assumption, Eq. 9, holds.

Occasionally rebinding interferences will occur, and Condition 1 is met. However, we argue that Eq. 9 is still likely to hold, because Condition 2 is not met: a ligand molecule is typically bound long enough for the previously bound molecules to diffuse into the bulk. Consider a detector that binds a ligand with a cross-section  $\sigma = 10$  nm, a diffusion constant  $D = 1 \mu\text{m}^2 \text{s}^{-1}$ , and an intrinsic rate  $k_a$  that equals the diffusion-limited rate  $k_D = 75 \mu\text{M}^{-1} \text{s}^{-1}$ , yielding an effective association rate  $k_{\text{on}} = 38 \mu\text{M}^{-1} \text{s}^{-1}$ , consistent with experimentally measured association rates (21). If the ligand is present at a biologically relevant concentration of  $c = 1 \mu\text{M}$ , then, for  $\bar{n} = 0.5$ , the time a ligand molecule is bound to the receptor is  $t_d = k_d^{-1} \approx 0.01$  s. During this time, the previously bound ligand molecule, on average, has traveled at least a distance

$$\sqrt{6Dt_d} \approx 0.3 \mu\text{m}.$$

This corresponds to  $\sim 4$  times the average distance between the ligand molecules at this concentration, meaning that, effectively, the ligand has diffused into the bulk. For lower concentrations, the dissociation time will be longer at constant  $\bar{n}$ , and the previously bound ligand molecule will have penetrated the bulk even deeper by the time that the newly bound ligand molecule dissociates. We thus expect that for concentrations up to micromolar, Condition

2 is not met—meaning that even when rebinding interferences do occasionally arise, and Eq. 9 still holds.

The other approximation of our theory, Eq. 12, ensures that the short- and long-time behavior of  $\mathcal{P}_{\text{rad}}(t|\text{eq})$  is described correctly. Importantly, however, under the biologically relevant concentrations considered here, the receptor-binding rate of ligand molecules starting from a uniform distribution is so low that to a good approximation  $\mathcal{P}_{\text{rad}}(t|\text{eq})$  is given by its long-time behavior,  $\mathcal{P}_{\text{rad}}(t|\text{eq}) \approx e^{-k_{\text{on}}ct}$  (see Fig. S1). The picture that thus emerges is that after a receptor-ligand dissociation event, the molecules that are not in contact with the receptor truly form a bulk reservoir:

1. They have a uniform distribution (Eq. 9), and
2. They bind the receptor in a memoryless fashion with a constant rate  $k_{\text{on}}c$ .

### A simple coarse-grained model

Ultimately, the success of Eq. 9 is due to the fact that the time a ligand molecule spends near the receptor is very short compared to the timescale on which ligand molecules arrive at the receptor from the bulk,  $(k_Dc)^{-1}$  (see Fig. S1). On this timescale a ligand molecule at contact with the receptor effectively either instantly (re)binds the receptor with splitting probability  $p_{\text{reb}}$  or escapes into the bulk with probability  $p_{\text{esc}} = 1 - p_{\text{reb}}$ . This observation naturally suggests the following simple two-state model (17), in which the system switches between a receptor-bound and a receptor-unbound state with effective association and dissociation rates (see Fig. 3).

To derive the effective dissociation rate, we note that for a ligand molecule that has just dissociated from the receptor, the probability that it will rebound the receptor rather than diffuse away into the bulk is  $p_{\text{reb}} = 1 - S_{\text{rad}}(\infty|\sigma) = k_a/(k_a + k_D)$ . The mean number of rounds of rebinding and dissociation before the molecule escapes into the bulk is then

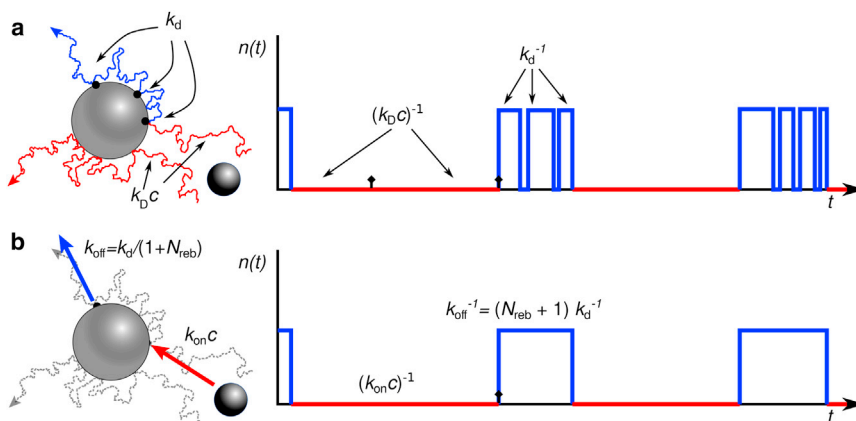

FIGURE 3 Cartoon of the coarse-grained model. (a) A typical time trace of the receptor state  $n(t)$  of the original system. (b) Time trace of the coarse-grained model. (Top-left cartoon; red) a successful and an unsuccessful binding trajectory; (blue) a trajectory in which a ligand molecule undergoes a number of rounds of receptor dissociation and rebinding before it escapes into the bulk. The key observation is that the time a molecule spends near the receptor is very short on the timescale at which molecules arrive from the bulk. This makes it possible to integrate out the receptor rebindings and the unsuccessful arrivals of molecules from the bulk, giving the two-state model of Eq. 19. Fig. S1 in the Supporting Material quantifies the timescale separation. To see this figure in color, go online.

$$N_{\text{reb}} = (1 - p_{\text{reb}}) \sum_{i=0}^{\infty} i p_{\text{reb}}^i = p_{\text{reb}} / (1 - p_{\text{reb}}) = k_a / k_D.$$

The total time  $t_{\text{on}}$  the ligand is bound to the receptor before it diffuses away is on average  $t_{\text{on}} = t_d(1 + N_{\text{reb}})$  and the effective dissociation rate is  $k_{\text{off}} = 1/t_{\text{on}} = k_d k_D / (k_a + k_D)$ , which is precisely the effective dissociation rate of our theory, Eq. 17.

A molecule that arrives at the receptor from the bulk at a rate  $k_D$  may either bind the receptor or escape back into the bulk. The escape probability is

$$p_{\text{esc}} = 1 - p_{\text{reb}} = S_{\text{rad}}(\infty | \sigma) = k_D / (k_a + k_D),$$

and the average number of times a molecule from the bulk encounters the receptor before it actually binds is

$$\begin{aligned} N_{\text{esc}} + 1 &= (1 - p_{\text{esc}}) \sum_{i=0}^{\infty} i p_{\text{esc}}^i + 1 = k_D / k_a + 1 \\ &= 1 / N_{\text{reb}} + 1. \end{aligned}$$

The effective rate at which a molecule binds from the bulk is then

$$k_{\text{on}} = k_D / (1 + N_{\text{esc}}) = k_a k_D / (k_a + k_D),$$

which is the diffusion-limited rate  $k_D$  times the probability

$$1 - S(\infty | \sigma) = k_a / (k_a + k_D)$$

that a molecule at contact binds the receptor instead of diffusing back into the bulk. This is the rate as predicted by our theory, Eq. 16. We note that the renormalization of the association and dissociation rates preserves the detailed-balance condition:

$$\bar{n} / (1 - \bar{n}) = k_a c / k_d = k_{\text{on}} c / k_{\text{off}}.$$

The dynamics of this two-state model is given by

$$\frac{dn(t)}{dt} = k_{\text{on}} c (1 - n(t)) - k_{\text{off}} n(t), \quad (19)$$

which, as Fig. 1 shows, correctly describes the relevant low-frequency dynamics of the receptor state. From Eq. 19, the power spectrum and hence, the uncertainty in our concentration estimate can be obtained straightforwardly:

$$\frac{\delta c}{c} = \sqrt{\frac{2}{k_{\text{on}} c (1 - \bar{n}) T}}. \quad (20)$$

Three points are worthy of note:

1. Noting that  $k_{\text{on}}$  is given by Eq. 16, the principal result of this article, Eq. 18, is reproduced.
2. For diffusion-limited reactions  $k_{\text{on}} = k_D$  and the expression of Berg and Purcell, namely, Eq. 3, is recovered.

3. Arguably, however, the most important result is that the Berg-Purcell expression can also be applied to reactions that are not diffusion-limited, by replacing  $k_D$  with  $k_{\text{on}}$ .

Point 3 is a nontrivial result, because Eq. 20 takes into account that not every arrival of ligand at a free receptor leads to binding, and also that upon dissociation a ligand molecule may rebind the receptor many times before it escapes into the bulk. This can be seen by exploiting the detailed-balance condition and rewriting Eq. 20 as

$$\frac{\delta c}{c} = \sqrt{\frac{2}{T} \left( \frac{1}{k_{\text{off}}} + \frac{1}{k_{\text{on}} c} \right)} = \sqrt{\frac{2\tau_w}{T}}. \quad (21)$$

This expression has a clear interpretation (see Fig. 3). A receptor-bound molecule that dissociates from the receptor may rebind the receptor, but the probability for this to happen does not depend on the concentration (15). As a result, a rebinding event does not provide information on the concentration and should therefore not be counted as a concentration measurement; it merely increases the receptor correlation time  $\tau_n$  by increasing its on-time from  $k_d^{-1}$  to  $k_{\text{off}}^{-1} = k_d^{-1} / (1 + N_{\text{reb}})$ . After  $(1 + N_{\text{reb}})$  rounds of dissociation and rebinding, the molecule escapes into the bulk, and then another molecule will arrive at the receptor with a rate  $k_D c$ . This molecule may return to the bulk or bind the receptor—in either case, possibly after a number of unsuccessful but rapid collisions—such that the net rate at which a molecule from the bulk binds the receptor is  $k_{\text{on}} c$ . Importantly, this binding event occurs in a memoryless fashion and with a rate that depends on the concentration. Consequently, this event does provide an independent measurement of the concentration. The time  $\tau_w = 1/k_{\text{off}} + 1/(k_{\text{on}} c)$  is thus the average time between independent concentration measurements, and  $T/\tau_w$  is the total number of such measurements in the integration time  $T$ .

## DISCUSSION

Using results from the theory of diffusion-influenced reactions by Agmon and Szabo (11), we have derived the fundamental limit for the precision of chemical concentration measurements via the reversible binding of ligand to a single receptor, a common motif in cell signaling. We have compared our expression to that of Berg and Purcell (3) and Bialek and Setayeshgar (9) and tested it against particle-based simulations. The premise of our study and that of Berg and Purcell (3) and Bialek and Setayeshgar (9) is that the concentration is estimated from the average receptor occupancy  $n_T$  over an integration time  $T$  set by the downstream network, and inverting the input-output relation  $\bar{n}(c)$  (3,9,22–25). Recently, Endres and Wingreen (26) and Mora and Wingreen (27) showed that maximum likelihood estimation can improve this estimate, but it is not clear whether typical networks do this.

Our theoretical analysis, as well as that of Berg and Purcell (3) and Bialek and Setayeshgar (9), assumes that the total number of ligand molecules in the system is fixed; the total concentration  $c$  is thus constant. Indeed, the only sources of fluctuations in the receptor state are the diffusion of ligand to and from the receptor, and the stochastic binding and unbinding of ligand to and from the receptor. Moreover, all three analyses assume that the ligand molecules are noninteracting, which is a very reasonable assumption at the low concentrations considered here. The reason that this is nonetheless a nontrivial many-body reaction-diffusion problem is due to the interactions of the ligand molecules with the receptor.

As described in the surrounding text for Eq. 9, due to these receptor-ligand interactions, the spatial distribution of ligand molecules, conditioned on the state of the receptor (or the time since the last receptor binding or unbinding event), can deviate from the equilibrium uniform distribution. Only by averaging over the entire ensemble of ligand distributions, taking into account those corresponding to both the bound and unbound states of the receptor, is the uniform equilibrium distribution obtained. The central assumption of our theory is that after each receptor dissociation event, the receptor and ligand molecule at contact are surrounded by a uniform, equilibrium distribution of ligand molecules (see Eq. 9). This assumption makes it possible to reduce the many-body problem to a pair problem, in which the ligand molecules bind the receptor independently of one another.

Also in the analysis of Berg and Purcell (3), the many-body reaction-diffusion problem is reduced to a pair problem. However, the key difference with our analysis is that their analysis strictly holds only for diffusion-limited reactions, but they argue that it also holds for reactions that are not diffusion-limited. In essence, they start from the assumption that the receptor switches between the ligand-bound and unbound states according to a random telegraph process with exponentially distributed waiting times, thus ignoring the rebinding trajectories with algebraic waiting times. The receptor correlation time  $\tau_n$ , needed to obtain the fundamental limit (see Eq. 5), is in this Markovian model given by the receptor-ligand association and dissociation rates. Berg and Purcell argue that the association rate  $k_f$  in the presence of unsuccessful ligand-receptor collisions can be obtained from the diffusion-limited binding rate  $k_D = 4\pi\sigma D$  via a rescaling of the cross-section  $\sigma$ , while the dissociation rate  $k_b$  can then be obtained from the detailed balance relation  $k_f c(1 - \bar{n}) = k_b \bar{n}$ . However, the validity of this Markovian model with the ad hoc rescaling of  $k_D$  to get  $k_f$  remained unclear.

Bialek and Setayeshgar (9) do not assume that the receptor-ligand association rate is diffusion-limited. Indeed, their physical model is identical to ours: ligand molecules are noninteracting; their overall concentration is constant; ligand and receptor associate with a rate  $k_a$  when at contact,

and dissociate with a rate  $k_d$  when bound. However, they analyze their model by writing down the reaction-diffusion equation, and then solve this equation invoking the fluctuation-dissipation theorem.

Our principal result (Eq. 18) consists of two terms, like the expression of Bialek and Setayeshgar (Eq. 4): one describes the effect of the diffusive transport of ligand to and from the receptor and the other describes the effect of the intrinsic binding kinetics when the ligand is in contact. However, whereas the intrinsic binding term agrees with that of Bialek and Setayeshgar, the diffusive term does not: it contains an additional factor  $1/(2(1 - \bar{n}))$ . We believe that this is because, by invoking the fluctuation-dissipation theorem, Bialek and Setayeshgar (9) linearize the reaction-diffusion problem, thereby ignoring correlations between the state of the receptor and the ligand concentration. The expression of Berg and Purcell (Eq. 3) does not feature a term that arises from the intrinsic binding. However, their term agrees with our diffusive term, which is considered to be the fundamental limit. Because both terms in our expression contain the factor  $1/(2(1 - \bar{n}))$ , our principal result Eq. 18 can be rewritten as Eq. 20, which shows that the expression of Berg and Purcell (Eq. 3) can be generalized to reactions that are not diffusion-limited by simply replacing  $k_D$  with  $k_{on}$ . Our simple coarse-grained model elucidates why this is possible:  $k_{on}c(1 - \bar{n}) = \tau_w^{-1}$  is the rate at which molecules independently bind the receptor from the bulk; via detailed balance, this expression not only captures the unsuccessful arrivals of molecules from the bulk, but also the receptor rebindings, which do not provide information about the concentration.

The purpose of sensing is to enable the detection of changes in the ligand concentration. If the concentration varies over only a small range around the dissociation constant  $K_D$ , then  $\bar{n}$  varies in a small interval around  $\bar{n} = 0.5$ , for which the expressions of Berg and Purcell (3) and Bialek and Setayeshgar (9) become equal. However, for most signaling systems it is not known how the ligand concentration varies under physiologically relevant conditions. Yet, information theory tells us that information transmission is maximized when the input distribution spans the full dynamic range of the signaling system, rather than a narrow range around  $K_D$  (28,29). Or, vice versa, in the case where the input distribution is fixed by the environment, the response curve that maximizes information transmission is one whose dynamic range matches the input distribution. This suggests that  $\bar{n}$  can be well above and below  $\bar{n} = 0.5$ —meaning that the difference between the respective expressions can become significant.

A comparison of the power spectrum of the receptor occupancy as predicted by our theory against results from particle-based simulations shows that our theory is very accurate under biologically relevant conditions. As Fig. S6 shows, the theory accurately predicts the zero-frequency limit of the power spectrum for concentrations up to at least



36  $\mu\text{M}$ . Given the complicated algebraic diffusion dynamics of rebinding trajectories, it is perhaps surprising that the error in the concentration estimate is so accurately predicted by a simple expression like Eq. 18 or 20. The success of this expression lies in the fact that biologically relevant concentrations are low, which means that the time a ligand molecule spends near the receptor is very short both on the timescale at which molecules arrive from the bulk and on the timescale a ligand molecule is bound to the receptor. This is the reason why both the rapid rebindings and the unsuccessful bulk arrivals can be integrated out, and the complicated many-body reaction-diffusion problem can be reduced to a pair problem in which ligand molecules interact with the receptor with renormalized association and dissociation rates (see Eq. 19).

Whether this simple approach can also be used when the ligand can bind to multiple receptors that are in close physical proximity remains an open question (3,9,22). Ligand rebinding between neighboring receptors may lead to nontrivial spatio-temporal correlations between the receptor states. Berezhkovskii and Szabo (12) have recently derived an expression for the accuracy of sensing via multiple receptors on a sphere, ignoring these spatio-temporal correlations. In the limit that the number of receptors goes to infinity, their expression for the accuracy of sensing in the diffusion-limited regime reduces to

$$\delta c/c = 1/\sqrt{2\pi DRcT}.$$

Paradoxically, by replacing the cross section of the receptor  $\sigma$  with twice the radius of the cell  $R$ , this is the result of Bialek and Setayeshgar (9) for a single receptor, Eq. 4: the expression for  $\delta c/c$  does not contain the factor  $1 - \bar{n}$ . The absence of this factor can be understood intuitively by noting that in the limit that the number of receptors goes to infinity, there will always be receptors available for binding the ligand. The fact that in this limit the result of Bialek and Setayeshgar (9) for a single receptor is recovered supports the idea that their analysis is essentially a mean-field analysis that ignores receptor-ligand correlations. For a finite number of receptors (including the scenario that there is only one receptor), the occupancy of the receptor will, however, affect the precision of sensing, and these correlations are important. Clearly, it will be of interest to test the accuracy of sensing via multiple receptors, and quantify the importance of spatio-temporal correlations, via simulations. We leave this for future work.

Finally, our observations have implications for the modeling of biochemical networks. They underscore our earlier observation (17) that when the cell does not exhibit concentration gradients on cellular length scales, the effect of diffusion can often be captured in a well-stirred model, which can then be simulated using the Gillespie algorithm (30) instead of a much more computationally demanding particle-based algorithm (15). In such a well-stirred model,

the rapid rebindings are integrated out and association and dissociation occur in a memoryless fashion, with exponentially distributed waiting times with mean  $(k_{\text{on}}c)^{-1}$  and  $k_{\text{off}}^{-1}$ , respectively. This is a simplification—at short times, the association-time distribution is algebraic due to the rebindings—but it is an accurate one. It not only preserves the equilibria of the association-dissociation reactions, but also the important noise characteristics of the network. Indeed, the high-frequency noise from the rapid rebindings is typically filtered by the network downstream and only the low-frequency noise, obeying exponential statistics, is significantly propagated downstream (17). On the other hand, when rebindings can qualitatively change the macroscopic behavior of the system, as in systems employing multisite protein modification, rebindings cannot simply be integrated out to yield the well-known macroscopic effective rate constants  $k_{\text{on}}$  and  $k_{\text{off}}$  (15,31). Yet, Gopich and Szabo (32) have recently shown that, because rebindings remain fast, it is nonetheless possible to arrive at an alternative simplified description for these systems that captures the effect of rebindings.

## SUPPORTING MATERIAL

Six figures, 73 equations, References (33, 34) and Supplemental information are available at [http://www.biophysj.org/biophysj/supplemental/S0006-3495\(13\)05847-5](http://www.biophysj.org/biophysj/supplemental/S0006-3495(13)05847-5).

We thank Attila Szabo, Howard Berg, and Bill Bialek for stimulating discussions and Bela Mulder for a critical reading of the manuscript. Calculations were performed on the RIKEN Integrated Cluster of Clusters (RICC) facility in Saitama, Japan.

This work is part of the research program of the Foundation for Fundamental Research on Matter, which is part of the Netherlands Organization for Scientific Research (NOW).

## REFERENCES

1. Rieke, F., and D. Baylor. 1998. Single-photon detection by rod cells of the retina. *Rev. Mod. Phys.* 70:1027–1036.
2. Boeckh, J., K.-E. Kaissling, and D. Schneider. 1965. Insect olfactory receptors. *Cold Spring Harb. Symp. Quant. Biol.* 30:263–280.
3. Berg, H. C., and E. M. Purcell. 1977. Physics of chemoreception. *Biophys. J.* 20:193–219.
4. Sourjik, V., and H. C. Berg. 2002. Receptor sensitivity in bacterial chemotaxis. *Proc. Natl. Acad. Sci. USA.* 99:123–127.
5. Ueda, M., and T. Shibata. 2007. Stochastic signal processing and transduction in chemotactic response of eukaryotic cells. *Biophys. J.* 93:11–20.
6. Gregor, T., D. W. Tank, ..., W. Bialek. 2007. Probing the limits to positional information. *Cell.* 130:153–164.
7. Erdmann, T., M. Howard, and P. R. ten Wolde. 2009. Role of spatial averaging in the precision of gene expression patterns. *Phys. Rev. Lett.* 103:258101.
8. Dubuis, J. O., G. Tkačik, ..., W. Bialek. 2013. Positional information, in bits. *Proc. Natl. Acad. Sci. USA.* 110:16301–16308.
9. Bialek, W., and S. Setayeshgar. 2005. Physical limits to biochemical signaling. *Proc. Natl. Acad. Sci. USA.* 102:10040–10045.

10. De Ronde, W. H. 2012. PhD thesis, Multiplexing Biochemical Signals. FOM Institute AMOLF, Amsterdam, The Netherlands.
11. Agmon, N., and A. Szabo. 1990. Theory of reversible diffusion-influenced reactions. *J. Chem. Phys.* 92:5270–5284.
12. Berezhkovskii, A. M., and A. Szabo. 2013. Effect of ligand diffusion on occupancy fluctuations of cell-surface receptors. *J. Chem. Phys.* 139:121910.
13. van Zon, J. S., and P. R. ten Wolde. 2005. Simulating biochemical networks at the particle level and in time and space: Green's function reaction dynamics. *Phys. Rev. Lett.* 94:128103.
14. van Zon, J. S., and P. R. ten Wolde. 2005. Green's-function reaction dynamics: a particle-based approach for simulating biochemical networks in time and space. *J. Chem. Phys.* 123:234910.
15. Takahashi, K., S. Tănase-Nicola, and P. R. ten Wolde. 2010. Spatio-temporal correlations can drastically change the response of a MAPK pathway. *Proc. Natl. Acad. Sci. USA.* 107:2473–2478.
16. Rice, S. A. 1985. Diffusion-Limited Reactions. Elsevier, Amsterdam, The Netherlands.
17. van Zon, J. S., M. J. Morelli, ..., P. R. ten Wolde. 2006. Diffusion of transcription factors can drastically enhance the noise in gene expression. *Biophys. J.* 91:4350–4367.
18. Opplestrup, T., V. V. Bulatov, ..., B. Sadigh. 2006. First-passage Monte Carlo algorithm: diffusion without all the hops. *Phys. Rev. Lett.* 97:230602.
19. Elowitz, M. B., M. G. Surette, ..., S. Leibler. 1999. Protein mobility in the cytoplasm of *Escherichia coli*. *J. Bacteriol.* 181:197–203.
20. Elf, J., G.-W. Li, and X. S. Xie. 2007. Probing transcription factor dynamics at the single-molecule level in a living cell. *Science.* 316:1191–1194.
21. Northrup, S. H., and H. P. Erickson. 1992. Kinetics of protein-protein association explained by Brownian dynamics computer simulation. *Proc. Natl. Acad. Sci. USA.* 89:3338–3342.
22. Wang, K., W.-J. Rappel, ..., H. Levine. 2007. Quantifying noise levels of intercellular signals. *Phys. Rev. E Stat. Nonlin. Soft Matter Phys.* 75:061905.
23. van Haastert, P. J. M. 2010. A stochastic model for chemotaxis based on the ordered extension of pseudopods. *Biophys. J.* 99:3345–3354.
24. Hu, B., W. Chen, ..., H. Levine. 2010. Physical limits on cellular sensing of spatial gradients. *Phys. Rev. Lett.* 105:048104.
25. Govern, C. C., and P. R. ten Wolde. 2012. Fundamental limits on sensing chemical concentrations with linear biochemical networks. *Phys. Rev. Lett.* 109:218103.
26. Endres, R. G., and N. S. Wingreen. 2009. Maximum likelihood and the single receptor. *Phys. Rev. Lett.* 103:158101.
27. Mora, T., and N. S. Wingreen. 2010. Limits of sensing temporal concentration changes by single cells. *Phys. Rev. Lett.* 104:248101.
28. Tkačik, G., C. G. Callan, Jr., and W. Bialek. 2008. Information flow and optimization in transcriptional regulation. *Proc. Natl. Acad. Sci. USA.* 105:12265–12270.
29. Tostevin, F., and P. R. ten Wolde. 2009. Mutual information between input and output trajectories of biochemical networks. *Phys. Rev. Lett.* 102:218101.
30. Gillespie, D. T. 1977. Exact stochastic simulation of coupled chemical reactions. *J. Phys. Chem.* 81:2340–2361.
31. Mugler, A., and P. R. ten Wolde. 2013. The macroscopic effects of microscopic heterogeneity in cell signaling. *Adv. Chem. Phys.* 153:373–396.
32. Gopich, I. V., and A. Szabo. 2013. Diffusion modifies the connectivity of kinetic schemes for multisite binding and catalysis. *Proc. Natl. Acad. Sci. USA.* 110:19784–19789.
33. Popov, A. V., and N. Agmon. 2001. Three-dimensional simulations of reversible bimolecular reactions: the simple target problem. *J. Chem. Phys.* 115:8921–8931.
34. Gopich, I. V., and A. Szabo. 2002. Kinetics of reversible diffusion influenced reactions: the self-consistent relaxation time approximation. *J. Chem. Phys.* 117:507–517.

## Supporting Information: The Berg-Purcell limit revisited

Kazunari Kaizu,<sup>1</sup> Wiet de Ronde,<sup>2</sup> Joris Paijmans,<sup>2</sup> Koichi Takahashi,<sup>1</sup> Filipe Tostevin,<sup>2</sup> and Pieter Rein ten Wolde<sup>2</sup>

<sup>1</sup>*RIKEN Quantitative Biology Center, Osaka 5650874, Japan*

<sup>2</sup>*FOM Institute AMOLF, Science Park 104, 1098 XG Amsterdam, The Netherlands*

### RELATIONS BETWEEN THE VARIANCE OF A TIME-ESTIMATE, THE CORRELATION FUNCTION AND THE POWER SPECTRUM

In this section we briefly describe how the variance of a time estimate of a specific quantity is related to the correlation function. We describe the state of a receptor with the variable  $n$ , where  $n = 0, 1$  depending on whether the receptor is free or bound, respectively. The estimate  $n_T$  of the receptor occupancy  $\bar{n}$ , obtained by integrating  $n(t)$  over an integration time  $T$ , is

$$n_T = \frac{1}{T} \int_0^T n(t) dt. \quad (\text{S1})$$

The variance in  $n_T$ ,  $\sigma_{n_T}^2$ , is given by

$$\sigma_{n_T}^2 = \langle n_T^2 \rangle - \langle n_T \rangle^2 \quad (\text{S2})$$

$$= \frac{1}{T^2} \int_0^T \int_0^T dt dt' \langle n(t) n(t') \rangle - \langle n_T \rangle^2 \quad (\text{S3})$$

$$= \frac{1}{T^2} \int_0^T \int_{-t}^{T-t} dt d\tau \langle n(0) n(\tau) \rangle - \langle n \rangle^2, \quad (\text{S4})$$

where in Eq. S4 we have defined  $\tau = t' - t$  and assumed the process to be stationary. The angular brackets denote an ensemble average over a large number of independent measurements. The correlation function for the observable  $n(t)$  is defined as

$$C_n(\tau) \equiv \langle n(0) n(\tau) \rangle - \langle n \rangle^2. \quad (\text{S5})$$

Substitution of Eq. S5 into Eq. S4 yields

$$\sigma_{n_T}^2 = \frac{1}{T^2} \int_0^T dt \int_{-t}^{T-t} d\tau C(\tau), \quad (\text{S6})$$

which in the limit of large  $T$  becomes

$$\begin{aligned} \sigma_{n_T}^2 &\stackrel{T \gg \tau_n}{=} \frac{1}{T} \int_{-\infty}^{\infty} d\tau C_n(\tau) \\ &= \frac{2\sigma_n^2 \tau_n}{T}. \end{aligned} \quad (\text{S7})$$

Here we have used the fact that  $\lim_{\tau \gg \tau_n} C_n(\tau) = 0$  and introduced the correlation time  $\tau_n$ :

$$\tau_n \equiv \frac{1}{\sigma_n^2} \int_0^{\infty} C_n(\tau) d\tau. \quad (\text{S8})$$

The correlation function and the power spectrum  $P_n(\omega)$  are related through the Fourier Transform

$$C_n(\tau) = \frac{1}{\sqrt{2\pi}} \int_{-\infty}^{\infty} d\omega P_n(\omega) e^{i\omega\tau}, \quad (\text{S9})$$

$$P_n(\omega) = \frac{1}{\sqrt{2\pi}} \int_{-\infty}^{\infty} d\tau C_n(\tau) e^{-i\omega\tau}, \quad (\text{S10})$$

such that

$$C_n(0) = \frac{1}{\sqrt{2\pi}} \int_{-\infty}^{\infty} d\omega P_n(\omega) = \sigma_n^2, \quad (\text{S11})$$

$$P_n(0) = \frac{1}{\sqrt{2\pi}} \int_{-\infty}^{\infty} d\tau C_n(\tau) = 2\sigma_n^2 \tau_n = T\sigma_{n_T}^2. \quad (\text{S12})$$

Because the correlation function is real and even in time, we have

$$P_n(\omega) = \hat{C}_n(s = i\omega) + \hat{C}_n(s = -i\omega), \quad (\text{S13})$$

where  $\hat{C}_n(s) = \int_0^{\infty} C_n(t) e^{-st}$  is the Laplace transform of the correlation function. The correlation time is therefore related to the Laplace transform of the correlation function by

$$2\sigma_n^2 \tau_n = P_n(0) \quad (\text{S14})$$

$$= 2\text{Re} \left[ \hat{C}(s = i\omega) \right]_{\omega=0}. \quad (\text{S15})$$

### TIME-DEPENDENT RATE CONSTANTS

Following Agmon and Szabo [1], we consider a single static receptor at the origin and a single ligand molecule that moves with diffusion constant  $D$ . The probability that the ligand molecule is at distance  $r$  at time  $t$  given that it was initially at a distance  $r_0$  is given by the Green's function  $p(r, t|r_0)$ . The evolution of the Green's function is given by the diffusion equation

$$\frac{\partial p(r, t|r_0)}{\partial t} = \frac{1}{r^2} \frac{\partial}{\partial r} D r^2 e^{-\beta U(r)} \frac{\partial}{\partial r} e^{\beta U(r)} p(r, t|r_0), \quad (\text{S16})$$

where  $\beta$  is the inverse temperature and  $U(r)$  is the interaction potential. The reaction between receptor and ligand is modeled as a boundary condition to the solution of this equation. If receptor and ligand can associate with the intrinsic association rate  $k_a$  when they are at the contact distance  $r = \sigma$ , then the boundary condition is

$$4\pi\sigma^2 D \left. \frac{\partial p(r, t|r_0)}{\partial r} \right|_{r=\sigma} = k_a p(\sigma, t|r_0). \quad (\text{S17})$$

If  $k_a$  is finite, then the boundary condition is called a radiation boundary condition, while if  $k_a \rightarrow \infty$ , the boundary condition is an absorbing condition. The latter must be used to obtain the rate constant of diffusion-limited reactions, where receptor and ligand associate upon the first collision.

The survival probability  $S_\alpha(t|r_0)$  is the probability that a particle, which starts at a position  $r_0$ , has not yet reacted at a later time  $t$ . It is given by

$$S_\alpha(t|r_0) = 4\pi \int_\sigma^\infty dr r^2 p(r, t|r_0). \quad (\text{S18})$$

The subscript  $\alpha$  is either “rad” or “abs”, corresponding to  $k_a$  being finite or infinite, respectively.

The propensity function  $R_\alpha(t|r_0)$  is the probability that a ligand particle, which starts at  $r = r_0$ , reacts for the first time at a later time  $t$ :

$$R_\alpha(t|r_0) = -\frac{\partial S_\alpha(t|r_0)}{\partial t}. \quad (\text{S19})$$

The time-dependent rate constant  $k_\alpha(t)$  is

$$k_\alpha(t) = 4\pi \int_\sigma^\infty dr_0 r_0^2 R_\alpha(t|r_0) p_{\text{eq}}(r_0). \quad (\text{S20})$$

The distribution  $p_{\text{eq}}(r_0)$  is the equilibrium radial distribution function,  $p_{\text{eq}}(r) = e^{-\beta U(r)}$ . If ligand and receptor only interact at contact as assumed in this study, then  $U(r) = 0$  for  $r \geq \sigma$  and  $p_{\text{eq}} = 1$ , meaning that the equilibrium distribution corresponds to a spatially uniform distribution. The time-dependent rate constant  $k_\alpha(t)$  divided by the volume  $V$  is the probability per unit amount of time that receptor and ligand associate for the first time at a later time  $t$ , averaged over all initial positions  $r_0$  drawn from the equilibrium distribution  $p_{\text{eq}}(r_0)$ .

For  $N$  non-interacting ligand molecules in a volume  $V$  at concentration  $c = N/V$ , which initially have an equilibrium distribution, the probability that no ligand molecules have reacted at a later time  $t$  is  $\mathcal{S}_\alpha(t|\text{eq})$ . In the limit that  $V \rightarrow \infty$  and  $N \rightarrow \infty$ , the probability that a ligand molecule reacts for the first time at a later time  $t$  is

$$-\frac{\partial \mathcal{S}_\alpha(t|\text{eq})}{\partial t} = k_{\text{rad}}(t) c \mathcal{S}_\alpha(t|\text{eq}). \quad (\text{S21})$$

This can be integrated to yield

$$\mathcal{S}_\alpha(t|\text{eq}) = e^{-c \int_0^t dt' k_\alpha(t')}. \quad (\text{S22})$$

The expressions Eq. S18 - Eq. S22 hold for both radiating and absorbing boundary conditions, corresponding to  $k_a$  being finite and infinite, respectively. When  $k_a$  is finite,  $R_{\text{rad}}(t|r_0)$  is also given by

$$R_{\text{rad}}(t|r_0) = k_a p(\sigma, t|r_0) \quad (\text{S23})$$

and the time-dependent rate constant  $k_{\text{rad}}(t)$  is then also given by

$$k_{\text{rad}}(t) = 4\pi k_a \int_\sigma^\infty dr_0 r_0^2 p(\sigma, t|r_0) p_{\text{eq}}(r_0) \quad (\text{S24})$$

To relate  $k_{\text{rad}}(t)$  to  $k_{\text{abs}}(t)$  in what follows below it will be useful to exploit the detailed-balance condition

$$p_{\text{eq}}(r_0) p(r, t|r_0) = p_{\text{eq}}(r) p(r_0, t|r). \quad (\text{S25})$$

We can integrate this equation over  $r_0$  to find

$$4\pi \int dr_0 r_0^2 p(r, t|r_0) p_{\text{eq}}(r_0) = p_{\text{eq}}(r) S_\alpha(t|r). \quad (\text{S26})$$

Combining this equation with Eq. S24 we find that

$$k_{\text{rad}}(t) = p_{\text{eq}}(\sigma) k_a S_{\text{rad}}(t|\sigma), \quad (\text{S27})$$

which for  $V(r) = 0$ , as assumed here, reduces to

$$k_{\text{rad}}(t) = k_a S_{\text{rad}}(t|\sigma). \quad (\text{S28})$$

The time-dependent rate constant  $k_{\text{rad}}(t)$  can be related to the time-dependent rate constant  $k_{\text{abs}}(t)$  via

$$k_{\text{rad}}(t) = \int_0^t dt' R_{\text{rad}}(t-t'|\sigma) k_{\text{abs}}(t'). \quad (\text{S29})$$

This can be understood by noting that  $k_{\text{abs}}(t')/V$  is the probability per unit amount of time that receptor and ligand come in contact for the first time at time  $t'$ , while  $R_{\text{rad}}(t-t'|\sigma)$  is the probability that receptor and ligand which start at contact  $r = \sigma$  at time  $t'$  associate a time  $t - t'$  later. In Laplace space, the above expression reads

$$\hat{k}_{\text{rad}}(s) = \hat{R}_{\text{rad}}(s|\sigma) \hat{k}_{\text{abs}}(s). \quad (\text{S30})$$

Since  $R_{\text{rad}}(t|\sigma) = -\partial S_{\text{rad}}(t|\sigma)/\partial t$ ,  $\hat{R}_{\text{rad}}(s|\sigma)$  is also given by

$$\hat{R}_{\text{rad}}(s|\sigma) = 1 - s \hat{S}_{\text{rad}}(s|\sigma). \quad (\text{S31})$$

The Laplace transform of Eq. S28 yields  $\hat{k}_{\text{rad}}(s) = k_a \hat{S}_{\text{rad}}(s|\sigma)$ . Combining this with Eq. S30 and Eq. S31 yields

$$\hat{k}_{\text{rad}}(s) = \frac{k_a \hat{k}_{\text{abs}}(s)}{k_a + s \hat{k}_{\text{abs}}(s)}. \quad (\text{S32})$$

## DERIVATION OF EQ. 13 OF MAIN TEXT

In this section we derive the correlation function and the correlation time for a receptor which switches between a ligand-bound state  $n = 1$  and a ligand-unbound state  $n = 0$ . The correlation function for the receptor state  $n$  is

$$C_n(\tau) = p_*^0(p_{*|*}(\tau) - p_*^0), \quad (\text{S33})$$

where  $p_*^0 = \langle n \rangle = \bar{n}$  is the equilibrium probability that the receptor is bound ( $*$ ) and  $p_{*|*}(\tau)$  is the probability that the receptor is bound at time  $t = \tau$ , given that it was bound initially. For every two-state process we can write

$$p_{*|*}(\tau) = 1 - p_{0|*}(\tau) \quad (\text{S34})$$

$$= 1 - \mathcal{S}_{\text{rev}}(\tau|*), \quad (\text{S35})$$

where  $\mathcal{S}_{\text{rev}}(\tau|*)$  is the probability that the receptor is free at time  $\tau$  given that it was bound initially; note that in between the receptor may have switched between the bound and unbound state many times. In Laplace space

$$\hat{p}_{*|*}(s) = s^{-1} - \hat{\mathcal{S}}_{\text{rev}}(s|*), \quad (\text{S36})$$

such that we have

$$\hat{C}_n(s) = p_*^0 \left( s^{-1} - \hat{\mathcal{S}}_{\text{rev}}(s|*) - \frac{p_*^0}{s} \right). \quad (\text{S37})$$

The initial value theorem states that the  $s \rightarrow \infty$  limit of  $s\hat{C}_n(s)$  in the Laplace domain is equal to the  $t \rightarrow 0$  limit of  $C(t)$  in the time domain, thus

$$\lim_{s \rightarrow \infty} s\hat{C}_n(s) = \lim_{t \rightarrow 0} C_n(t) = \sigma_n^2. \quad (\text{S38})$$

For a binary process the variance is

$$\sigma_n^2 = p_*^0(1 - p_*^0) = \bar{n}(1 - \bar{n}). \quad (\text{S39})$$

The Laplace transform of Eq. 8 of the main text yields

$$\mathcal{L} \left[ \mathcal{S}_{\text{rev}}(t|*) = k_d \int_0^t [1 - \mathcal{S}_{\text{rev}}(t'|*)] \mathcal{S}_{\text{rad}}(t - t'|\sigma) dt' \right] \quad (\text{S40})$$

$$\implies s\hat{\mathcal{S}}_{\text{rev}}(s|*) = \frac{k_d \hat{\mathcal{S}}_{\text{rad}}(s|\sigma)}{1 + k_d \hat{\mathcal{S}}_{\text{rad}}(s|\sigma)}. \quad (\text{S41})$$

We assume the ligand particles are non-interacting and, following Agmon and Szabo [1], we approximate the survival probability as

$$\mathcal{S}_{\text{rad}}(t|\sigma) = \mathcal{S}_{\text{rad}}(t|\text{eq}) S_{\text{rad}}(t|\sigma). \quad (\text{S42})$$

This is Eq. 9 of the main text. Here  $S_{\text{rad}}(t|\sigma)$  is the survival probability for the geminate receptor-ligand pair at contact; it is the probability that a receptor which initially is surrounded by *only one* ligand molecule at contact, is still free at a later time  $t$ . The quantity  $\mathcal{S}_{\text{rad}}(t|\text{eq})$  is the survival probability for the receptor in a sea of equilibrated ligand molecules. In the main text we elaborate on the assumptions underlying this approximation.

We now relate the survival probability  $\mathcal{S}_{\text{rad}}(t|\text{eq})$  for a receptor surrounded by an equilibrium distribution of ligand molecules to the survival probability  $S_{\text{rad}}(t|\sigma)$  for a receptor with only ligand molecule at contact. To this end, we exploit that both survival probabilities can be

related to the time-dependent rate constant  $k_{\text{rad}}(t)$ . As shown in the previous section (Eq. S28), detailed balance yields [1]

$$k_{\text{rad}}(t) = k_a S_{\text{rad}}(t|\sigma). \quad (\text{S43})$$

On the other hand, we know that  $\mathcal{S}_{\text{rad}}(t|\text{eq})$  is given by (see Eq. S22 in previous section)

$$\mathcal{S}_{\text{rad}}(t|\text{eq}) = e^{-c \int_0^t k_{\text{rad}}(t') dt'}. \quad (\text{S44})$$

Combining these two equations yields the following expression for the time derivative of  $\mathcal{S}_{\text{rad}}(t|\text{eq})$ :

$$\frac{d\mathcal{S}_{\text{rad}}(t|\text{eq})}{dt} = -ck_{\text{rad}}(t) \mathcal{S}_{\text{rad}}(t|\text{eq}) \quad (\text{S45})$$

$$= -ck_a S_{\text{rad}}(t|\sigma) \mathcal{S}_{\text{rad}}(t|\text{eq}) \quad (\text{S46})$$

$$= -ck_a \mathcal{S}_{\text{rad}}(t|\sigma). \quad (\text{S47})$$

The Laplace transform of Eq. S47 is

$$s\hat{\mathcal{S}}_{\text{rad}}(s|\text{eq}) - 1 = -ck_a \hat{\mathcal{S}}_{\text{rad}}(s|\sigma). \quad (\text{S48})$$

Combining this equation with Eq. S41 gives

$$1 - s\hat{\mathcal{S}}_{\text{rev}}(s|*) = \frac{cK_{\text{eq}}}{1 + cK_{\text{eq}} - s\hat{\mathcal{S}}_{\text{rad}}(s|\text{eq})}, \quad (\text{S49})$$

where  $K_{\text{eq}} = k_a/k_d$  is the equilibrium constant. Substituting this result in Eq. S37, we find

$$\begin{aligned} \hat{C}_n(s) &= \frac{\bar{n}}{s} \left( 1 - s\hat{\mathcal{S}}_{\text{rev}}(s|*) - \bar{n} \right) \\ &= \frac{\bar{n}}{s} \left( \frac{cK_{\text{eq}}(1 - \bar{n}) + \bar{n}\hat{\mathcal{S}}_{\text{rad}}(s|\text{eq}) - \bar{n}}{1 + cK_{\text{eq}} - s\hat{\mathcal{S}}_{\text{rad}}(s|\text{eq})} \right) \\ &= \sigma_n^2 \frac{\bar{n}\hat{\mathcal{S}}_{\text{rad}}(s|\text{eq})}{1 - (1 - \bar{n})s\hat{\mathcal{S}}_{\text{rad}}(s|\text{eq})}, \end{aligned} \quad (\text{S50})$$

where in deriving the last line we have used that  $cK_{\text{eq}} = \bar{n}/(1 - \bar{n})$  and  $\sigma_n^2 = \bar{n}(1 - \bar{n})$ . Noting that  $\bar{n} = k_a c \tau_c$  and  $1 - \bar{n} = k_d \tau_c$ , with  $\tau_c = (k_a c + k_d)^{-1}$  the intrinsic correlation time, Eq. 11 of the main text is obtained.

To continue, an expression for  $\hat{\mathcal{S}}_{\text{rad}}(s|\text{eq})$  is required. A general expression for the Laplace transform of Eq. S44 is not available. We can, however, expand  $\mathcal{S}_{\text{rad}}(t|\text{eq})$ ,

$$\mathcal{S}_{\text{rad}}(t|\text{eq}) = e^{-c \int_0^t k_{\text{rad}}(t') dt'} \quad (\text{S51})$$

$$\approx 1 - c \int_0^t k_{\text{rad}}(t') dt' + \dots, \quad (\text{S52})$$

and now take the Laplace transform [1]:

$$\hat{\mathcal{S}}_{\text{rad}}(s|\text{eq}) = s^{-1} - s^{-1} c \hat{k}_{\text{rad}}(s) + \dots \quad (\text{S53})$$

$$\approx s^{-1} \left( 1 + c \hat{k}_{\text{rad}}(s) \right)^{-1}. \quad (\text{S54})$$

For small times and low concentrations, the above approximation is accurate because the higher order terms in

the expansions of Eq. S52 and Eq. S53 can be neglected. For long times,  $k_{\text{rad}}(t)$  becomes constant,  $k_{\text{rad}}(t \rightarrow \infty) = k_{\text{on}}$ , and the Laplace transform of  $\mathcal{S}_{\text{rad}}(t|\text{eq})$  is exactly given by Eq. S54, with  $\hat{k}_{\text{rad}}(s) = k_{\text{on}}/s$ .

The Laplace transform  $\hat{k}_{\text{rad}}(s)$  of the time-dependent rate constant  $k_{\text{rad}}(t)$  can be related to the Laplace transform  $\hat{k}_{\text{abs}}(s)$  of the time-dependent rate constant  $k_{\text{abst}}(t)$  of a diffusion-limited reaction via (see previous section) [1]

$$\hat{k}_{\text{rad}}(s) = \frac{k_a k_{\text{abs}}(s)}{k_a + s k_{\text{abs}}(s)}. \quad (\text{S55})$$

The time-dependent rate constant  $k_{\text{abs}}(t)$  of a diffusion-limited reaction is [2]

$$k_{\text{abs}}(t) = 4\pi\sigma D \left(1 + \sigma/\sqrt{\pi Dt}\right), \quad (\text{S56})$$

which in the Laplace domain becomes

$$s\hat{k}_{\text{abs}}(s) = k_D \left(1 + \sigma\sqrt{s/D}\right), \quad (\text{S57})$$

$$= k_D (1 + \tau(s)), \quad (\text{S58})$$

where  $\tau(s) \equiv \sigma\sqrt{s/D} = \sqrt{s\tau_m}$  with the molecular time scale  $\tau_m = \sigma^2/D$  and  $k_D \equiv k_{\text{abs}}(t \rightarrow \infty) = 4\pi\sigma D$  is the diffusion-limited reaction rate. Substituting this in Eq. S55 gives

$$\hat{k}_{\text{rad}}(s) = \frac{k_a k_D}{s} \frac{1 + \tau(s)}{k_a + k_D (1 + \tau(s))}, \quad (\text{S59})$$

which can be plugged into Eq. S54 to yield

$$\hat{\mathcal{S}}_{\text{rad}}(s|\text{eq}) \approx \frac{k_a + k_D (1 + \tau(s))}{s(k_a + k_D (1 + \tau(s))) + c k_a k_D (1 + \tau(s))}. \quad (\text{S60})$$

We now insert the above expression into Eq. S50, which gives

$$\begin{aligned} \hat{C}_n(s) &= \sigma_n^2 \frac{\bar{n}(k_a + k_D(1 + \tau(s)))}{c k_a k_D (1 + \tau(s)) + \bar{n} s (k_a + k_D(1 + \tau(s)))} \\ &= \sigma_n^2 \frac{\tau_c (k_a + k_D(1 + \tau(s)))}{k_D (1 + \tau(s)) + \tau_c s (k_a + k_D(1 + \tau(s)))}, \end{aligned} \quad (\text{S61})$$

where we have used that  $\bar{n} = k_a c \tau_c$ , with  $\tau_c = (k_a c + k_d)^{-1}$  the intrinsic correlation time of the receptor. We define

$$\Sigma(s) \equiv \frac{k_a}{k_D (1 + \tau(s))} \quad (\text{S62})$$

and the receptor correlation time  $\tau'_c(s)$  renormalized by concentration fluctuations:

$$\tau'_c(s) \equiv \tau_c (1 + \Sigma(s)), \quad (\text{S63})$$

$$= \frac{k_a + k_D (1 + \tau(s))}{k_D (1 + \tau(s))}. \quad (\text{S64})$$

We now substitute the above expression in Eq. S61 to arrive at Eq. 13 of the main text:

$$\hat{C}_n(s) = \sigma_n^2 \frac{\tau'_c(s)}{s \tau'_c(s) + 1}. \quad (\text{S65})$$

To obtain the correlation time, we take the limit  $s = 0$  since  $\text{Re}[\hat{C}_n(s=0)] = \sigma_n^2 \tau_n$  (see Eq. S14):

$$\hat{C}_n(s=0) = \frac{P_n(\omega=0)}{2} \quad (\text{S66})$$

$$= \sigma_n^2 \frac{k_a + k_D}{(k_a c + k_d) k_D}. \quad (\text{S67})$$

Hence, the receptor correlation time, normalized by concentration fluctuations, is

$$\tau_n = \tau'_c(s \rightarrow 0), \quad (\text{S68})$$

$$= \frac{k_a + k_D}{(k_a c + k_d) k_D}. \quad (\text{S69})$$

## VALIDITY OF ASSUMPTIONS UNDER BIOLOGICALLY RELEVANT CONDITIONS

Our theory makes two assumptions: **I** After receptor dissociation, the unbound receptor-ligand pair is surrounded by a uniform distribution of ligand molecules; this is described by Eq. 9 of the main text and Eq. S42 of the SI; **II** the Laplace transform of  $\mathcal{S}_{\text{rad}}(t|\text{eq})$  is given by Eq. 12 of the main text and Eq. S54 of the SI. Below, we address the validity of these two assumptions. But before doing so, we give a qualitative argument for why both assumptions are satisfied.

### Timescale separation

The validity of both assumptions is rooted in a timescale separation: the time a molecule spends near the receptor is very short compared to the timescale on which molecules bind the receptor from the bulk, *i.e.* starting from a uniform distribution. This is illustrated in Fig. S1. It is seen that  $S_{\text{rad}}(t|\sigma)$  (blue dashed line) decays much more rapidly than  $\mathcal{S}_{\text{rad}}(t|\text{eq})$  (red solid line). Indeed, a ligand molecule near the receptor effectively either instantly (re)binds the receptor or diffuses into the bulk. Consequently, the probability of rebinding interference is very small, meaning that assumption **I** is satisfied.

The second assumption **II** follows from the observation that the range over which  $\mathcal{S}_{\text{rad}}(t|\text{eq}) = e^{-c \int_0^t dt' k_{\text{rad}}(t')}$  deviates from its exponential decay at long times,  $\lim_{t \rightarrow \infty} \mathcal{S}_{\text{rad}}(t|\text{eq}) \approx e^{-k_{\text{on}} ct}$ , is given by  $S_{\text{rad}}(t|\sigma)$ —the rate at which  $k_{\text{rad}}(t)$  reaches its limiting value  $k_{\text{on}}$  is given by  $S_{\text{rad}}(t|\sigma)$ , see Eq. S43. Because  $S_{\text{rad}}(t|\sigma)$  decays much faster than  $\mathcal{S}_{\text{rad}}(t|\text{eq})$  (see Fig. S1),  $\mathcal{S}_{\text{rad}}(t|\text{eq})$  can be

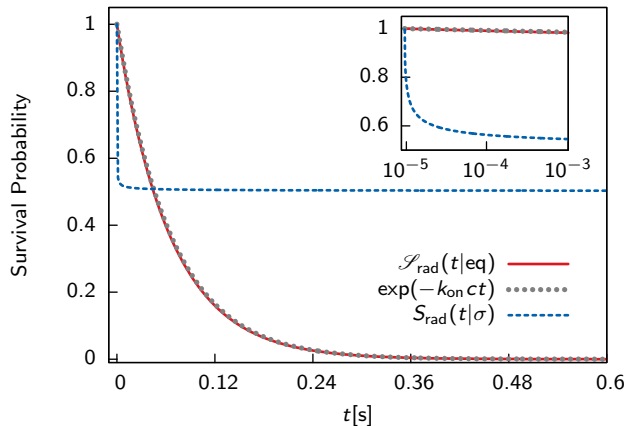

FIG. S1. Illustration of timescale separation, which underlies the validity of our theory and provides the motivation for the simple-coarse-grained model. The survival probability of a free receptor surrounded by only one ligand molecule which initially is at contact,  $S_{\text{rad}}(t|\sigma)$  (blue dashed line), decays much more rapidly than the survival probability for a free receptor that is initially surrounded by an equilibrium, uniform distribution of ligand molecules,  $\mathcal{S}_{\text{rad}}(t|\text{eq}) = e^{-c \int_0^t k_{\text{rad}}(t') dt'}$  (solid red line). This shows that the time a molecule spends near the receptor (given by the decay of  $S_{\text{rad}}(t|\sigma)$ ) is very small compared to the average time on which molecules arrive from the bulk (given by  $\tau_{\text{off}} = \int_0^\infty dt' \mathcal{S}_{\text{rad}}(t'|\text{eq})$ ). Indeed, on this timescale, a ligand molecule near the receptor effectively either instantly (re)binds the receptor or diffuses into the bulk. This separation of timescales means that rebinding interference occurs only rarely (see also Fig. S3) and that assumption **I** of our theory, Eq. S42, is satisfied; it also makes it possible to integrate out the rebindings. The figure also shows that  $\mathcal{S}_{\text{rad}}(t|\text{eq})$  is well approximated by its long-time behavior  $\lim_{t \rightarrow \infty} \mathcal{S}_{\text{rad}}(t|\text{eq}) \approx e^{-k_{\text{on}} ct}$  (dotted grey line). This means that bulk molecules arrive at the receptor in a memoryless fashion at a constant rate  $k_{\text{on}} c$  and that assumption **II** is satisfied. Parameters:  $\sigma = 10 \text{ nm}$ ,  $c = 0.4 \mu\text{M}$ ,  $D = 1 \mu\text{m}^2 \text{s}^{-1}$ ,  $k_a = 75 \mu\text{M}^{-1} \text{s}^{-1}$ ,  $k_D = 75 \mu\text{M}^{-1} \text{s}^{-1}$ .

well approximated by its long-time limit  $\mathcal{S}_{\text{rad}}(t|\text{eq}) \approx e^{-k_{\text{on}} ct}$ . This means that also assumption **II** is satisfied.

We now address both assumptions quantitatively.

### Assumption I: the equilibrium assumption

As discussed in the main text, the equilibrium assumption, Eq. 9 of the main text (Eq. S42), holds when there is no rebinding interference. To address the probability of rebinding interference, we first study the propensity for receptor binding given that a ligand molecule has just dissociated and now is at contact with the receptor; the other molecules have the equilibrium, uniform distribu-

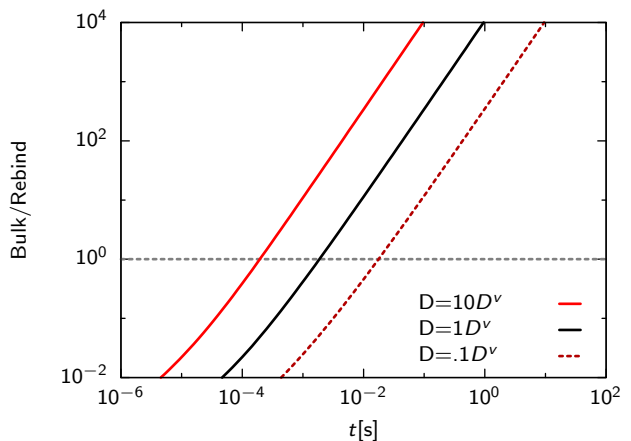

FIG. S2. The ratio of the change in  $\mathcal{S}_{\text{rad}}$  due to a bulk binding and a rebinding of a dissociated ligand particle; this is the ratio of the two terms on the right-hand-side of Eq. S70. The bulk dominates the propensity function already at very small  $t$ . Parameters:  $\sigma = 10 \text{ nm}$ ,  $c = 0.4 \mu\text{M}$ ,  $D^v = 1 \mu\text{m}^2 \text{s}^{-1}$ ,  $k_a = 75 \mu\text{M}^{-1} \text{s}^{-1}$ .

tion. From Eq. 9 of the main text (Eq. S42) we have

$$\frac{d\mathcal{S}_{\text{rad}}(t|\sigma)}{dt} = \underbrace{S_{\text{rad}}(t|\sigma) \frac{d\mathcal{S}_{\text{rad}}(t|\text{eq})}{dt}}_{\text{bulk-binding}} + \underbrace{\mathcal{S}_{\text{rad}}(t|\text{eq}) \frac{dS_{\text{rad}}(t|\sigma)}{dt}}_{\text{rebinding}}. \quad (\text{S70})$$

This is the propensity function for receptor binding, *i.e.* the probability that a receptor with a ligand molecule at contact and surrounded by a uniform distribution of ligand molecules, binds a ligand molecule for the first time at a later time  $t$ . The first term is the probability that this ligand molecule is a molecule from the bulk, while the second gives the probability that this is the ligand molecule that was in contact. Fig. S2 shows the ratio of these two terms. It is seen that only at very short times, rebindings dominate the bulk bindings. For long times, receptor binding is completely dominated by the binding of molecules from the bulk, which in our theory, as well as in the simulations, bind the receptor in a memoryless fashion (see below for further details).

Eq. S70 allows us to derive an expression for the probability  $p_{\text{int}}$  that an interference occurs. Here, interference is defined as an event in which the binding of a molecule from the bulk pre-empts, and thereby prevents, the receptor rebinding of a molecule that has just dissociated from the receptor. If the unbound receptor-ligand pair at contact is surrounded by an equilibrium distribution of ligand molecules, then the probability that a ligand molecule from the bulk does not interfere with the recep-

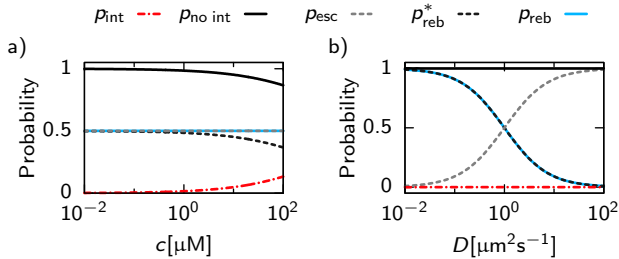

FIG. S3. Probability  $p_{\text{int}}$  (red dash-dotted line) that a ligand molecule from the bulk interferes with the receptor rebinding of a dissociated ligand molecule as a function of the concentration  $c$  (a) and diffusion constant  $D$  (b). The probability  $1 - p_{\text{int}}$  of no interference (black line) consists of two terms (see Eq. S71): the probability  $p_{\text{reb}}^*$  that the dissociated ligand molecule rebinds the receptor before a molecule from the bulk does (dashed black line) and the probability  $p_{\text{esc}} = S_{\text{rad}}(\infty|\sigma) = k_D/(k_a + k_D) = 1 - p_{\text{reb}}$  that it escapes into the bulk (dashed gray line; second term). It is seen that for concentrations  $c \lesssim \mu\text{M}$  bulk molecules hardly interfere with the receptor rebinding of dissociated ligand molecules. This is the motivation for the simplified model of Fig. 3 of the main text. In the simplified coarse-grained model, the probability of rebinding is approximated as  $p_{\text{reb}} = 1 - p_{\text{esc}} \approx S_{\text{rad}}(t \rightarrow \infty|\sigma) = k_a/(k_a + k_D)$  (solid blue line); this corresponds to assuming that in the expression for  $p_{\text{reb}}$ , the first term on the right-hand side of Eq. S71,  $\mathcal{S}_{\text{rad}}(t|\text{eq}) \approx 1$ . See also Fig. S1. Parameters:  $k_a = 75 \mu\text{M}^{-1}\text{s}^{-1}$ ,  $\sigma = 10 \text{ nm}$ ; in panel a)  $D = 1 \mu\text{m}^2\text{s}^{-1}$  and  $k_D = 75 \mu\text{M}^{-1}\text{s}^{-1}$ ; because  $k_a = k_D$ ,  $p_{\text{reb}} = p_{\text{esc}} = 0.5$ ; in panel b)  $c = 0.4 \mu\text{M}$ .

tor rebinding of the ligand molecule at contact, is

$$1 - p_{\text{int}} = - \int_0^\infty \frac{dS_{\text{rad}}(t|\sigma)}{dt} \mathcal{S}_{\text{rad}}(t|\text{eq}) dt + S_{\text{rad}}(\infty|\sigma). \quad (\text{S71})$$

Here the first term on the right-hand-side is the integral of the second term on the right-hand-side of Eq. S70 — it is the probability that the ligand molecule which has just dissociated from the receptor rebinds the receptor before a ligand molecule from the bulk does; the second term  $S_{\text{rad}}(\infty|\sigma)$  is the probability that the ligand molecule at contact (with no other ligand molecules present) escapes into the bulk — when the ligand at contact escapes into the bulk, then, by definition, it does not rebind and rebinding interference therefore does not arise. Combining the above expression with Eq. S70 shows that the probability of rebinding interference is

$$p_{\text{int}} = - \int_0^\infty dt [S_{\text{rad}}(t|\sigma) - S_{\text{rad}}(\infty|\sigma)] \frac{d\mathcal{S}_{\text{rad}}(t|\text{eq})}{dt}, \quad (\text{S72})$$

where  $[S_{\text{rad}}(t|\sigma) - S_{\text{rad}}(\infty|\sigma)] d\mathcal{S}_{\text{rad}}(t|\text{eq})/dt$  is the probability that a molecule from the bulk binds the receptor before the ligand molecule which started at contact and that would have rebound the receptor if there

were no other ligand molecules, does. Fig. S3 shows that for biologically relevant concentrations and diffusion constants, the probability of rebinding interference,  $p_{\text{int}}$ , is very small, which means that the central assumption holds.

### Assumption II: Survival probability of a receptor surrounded by an equilibrium distribution of particles

The second assumption is that the Laplace transform of  $\mathcal{S}_{\text{rad}}(t|\text{eq})$  is given by Eq. 12 of the main text and Eq. S54 of the *SI*. As mentioned above, this expression captures both the short- and long-time limit of the survival probability. Fig. S1 illustrates, however, that biologically relevant concentrations are so low that, to a very good approximation, the survival probability is given by its long-time limit:  $\mathcal{S}_{\text{rad}}(t|\text{eq}) = e^{-c \int_0^t k_{\text{rad}}(t') dt'} \approx e^{-k_{\text{on}} ct}$ . This means that the molecules other than the one which has dissociated last bind, to an excellent approximation, the receptor in a memoryless fashion with a constant rate  $k_{\text{on}} c$ .

We can quantify this approximation further by investigating the mean unbound time  $\tau_{\text{off}} = \int_0^\infty \mathcal{S}_{\text{rad}}(t|\text{eq}) dt = \hat{\mathcal{S}}_{\text{rad}}(s=0|\text{eq})$ ; this is the mean waiting time for binding. Eq. S50 shows that the central approximation of our theory, Eq. S42 (Eq. 9 of the main text), predicts that the zero-frequency limit of the power spectrum and hence the correlation time  $\tau_n$  and the precision of the concentration estimate, are determined by  $\bar{n}$  and  $\tau_{\text{off}}$ :

$$\hat{C}_n(s=0) = \sigma_n^2 \bar{n} \tau_{\text{off}}. \quad (\text{S73})$$

Indeed, because  $\hat{C}_n(s=0) = \sigma_n^2 \tau_n$  (see Eq. S15),  $\tau_n = \bar{n} \tau_{\text{off}}$ . The exact mean unbound time for a free receptor surrounded by ligand molecules obeying the equilibrium distribution is  $\tau_{\text{off}} = \int_0^\infty \mathcal{S}_{\text{rad}}(t|\text{eq}) dt = \int_0^\infty e^{-c \int_0^t k_{\text{rad}}(t') dt'} dt$ . In contrast, the approximation of Eq. S54 predicts an average unbound time of  $1/(k_{\text{on}} c)$ . Note that while this is the mean waiting time for Markovian binding with rate  $k_{\text{on}} c$ , the approximation of Eq. S54 does *not* assume that binding is Markovian for all times—only in the long-time limit does binding occur with a constant rate. Fig. S4 shows the relative error in the mean unbound time as a function of the concentration. It is seen that for biologically relevant concentrations  $c \lesssim \mu\text{M}$  the relative error is indeed small, less than 10%.

### COMMENTS ON COMPARISON BETWEEN THEORY AND SIMULATIONS

Our theory accurately predicts the power spectrum over the full frequency range, even though our simulation box is finite and the theory is for an unbounded



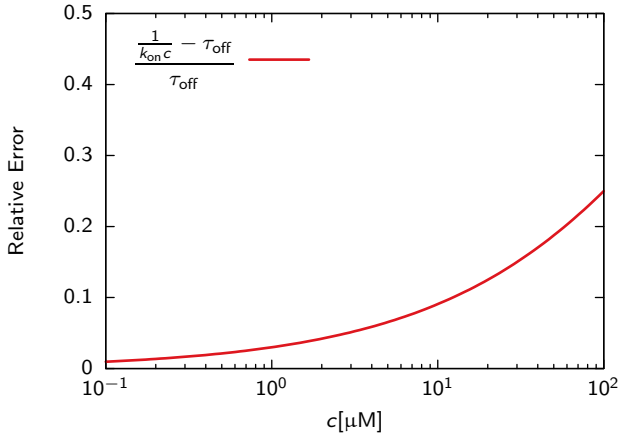

FIG. S4. The relative error in the average off-time, *i.e.* the average waiting time for a new molecule to associate, assuming that the receptor is initially surrounded by a uniform distribution of ligand molecules. The exact unbound time  $\tau_{\text{off}} \equiv \int_0^\infty \mathcal{S}_{\text{rad}}(t|\text{eq}) dt = \int_0^\infty e^{-c \int_0^t k_{\text{rad}}(t') dt'} dt$  while Eq. S54 assumes that it is  $1/(k_{\text{on}}c)$ . Eq. S54 does not assume that binding is Markovian for all times; yet its average waiting time is equal to that of a Markovian binding process. The simple, coarse-grained model assumes binding is Markovian for all times. Note that for  $c \lesssim \mu\text{M}$  the theory and hence the coarse-grained model gives a reasonable prediction for the off time. Parameters:  $D = 1 \mu\text{m}^2\text{s}^{-1}$ ,  $k_a = 55 \mu\text{M}^{-1}\text{s}^{-1}$ ,  $\sigma = 10 \text{ nm}$ ,  $k_D = 75 \mu\text{M}^{-1}\text{s}^{-1}$ .

domain. It is well known that in an unbounded system, the correlation function exhibits an algebraic tail [3, 4]. This is because the relaxation of a fluctuation of the receptor state involves not only the binding and unbinding of ligand, but also the diffusive transport of ligand to and from the receptor. While the binding and unbinding of ligand continually perturbs the ligand concentration profile, diffusion counteracts these perturbations, leading to the relaxation of the concentration profile back to its equilibrium shape. In an unbounded system, the relaxation of the concentration profile involves diffusion-mediated transport of ligand on infinitely long length and time scales, thereby dominating the relaxation of the receptor state at long times. This is the origin of the algebraic tail of the receptor correlation function for diffusion-influenced reactions in an unbounded system.

In contrast, the simulation box of our system is finite and the collisions of the ligand molecules with the cell boundaries randomize their trajectories on time scales longer than  $L^2/D$ . Consequently, in the simulations the bulk molecules thus bind the receptor in a Markovian fashion at a constant rate at long times, leading to exponential relaxation of fluctuations of the receptor state at long times.

The correlation function of our theory does exhibit a small algebraic tail (Fig. S5), which is the remnant of

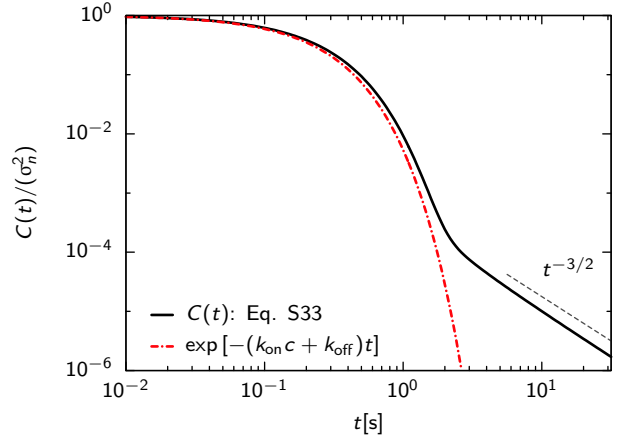

FIG. S5. The correlation function of our theory (black solid line) compared with that of a random telegraph process (red dotted curve). At long times, our theory exhibits a small algebraic tail, which is the remnant of  $S_{\text{rad}}(t|\sigma)$  in Eq. S42.  $D = 1 \mu\text{m}^2\text{s}^{-1}$ ,  $k_a = 75 \mu\text{M}^{-1}\text{s}^{-1}$ ,  $\sigma = 10 \text{ nm}$ ,  $k_D = 75 \mu\text{M}^{-1}\text{s}^{-1}$ ,  $c = 0.4 \mu\text{M}$ .

the factor  $S_{\text{rad}}(t|\sigma)$  in Eq. S42—the probability that a free receptor with a single molecule at contact is still free at a later time  $t$  in an unbounded system. However, in Eq. S42 we assume that the other ligand molecules, forming the “bulk” with survival probability  $\mathcal{S}_{\text{rad}}(t|\text{eq})$ , do have a uniform distribution. At long times  $t \gg \tau_m$  these molecules will associate with the receptor in a memoryless fashion with a constant rate  $k_{\text{on}}c$ , as described above (Fig. S1). Moreover, in this limit they dominate receptor binding (Fig. S2), as a result of which the algebraic tail of our theory is very small—smaller than observed for diffusion-influenced reactions in an unbounded domain [3, 4]. Both in our theory and our simulations, at long times the receptor dynamics is thus to a good approximation a random telegraph process with an on rate  $k_{\text{on}}c$  and an off rate  $k_{\text{off}}$ .

## TEST FOR HIGHER CONCENTRATIONS

Fig. S6 shows the zero-frequency limit of the power spectrum  $P_n(\omega \rightarrow 0)$  for two higher concentrations,  $c = 4 \mu\text{M}$  and  $c = 36 \mu\text{M}$ , respectively. While for higher concentrations, it becomes increasingly difficult to obtain good statistics, our results suggest that for concentrations up to at least  $c = 36 \mu\text{M}$ , our theory accurately predicts the precision by which chemical concentrations can be measured.

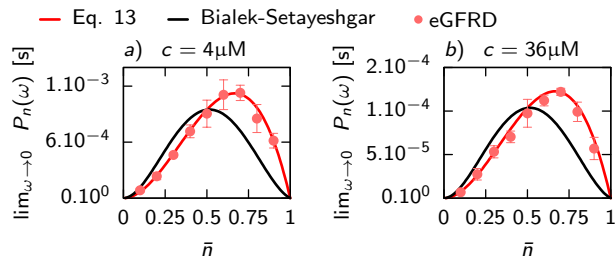

FIG. S6. The zero-frequency limit of the power spectrum as a function of the receptor occupancy  $\bar{n}$  for a concentration and box size of  $c = 4\mu\text{M}$  and  $L = 0.25\mu\text{m}$  (panel a) and  $c = 36\mu\text{M}$  and  $L = 0.80\mu\text{m}$  (panel b), respectively. The red dots show the simulation results, while the red line shows the prediction of our theory. It is seen that the agreement is good, even for the highest concentration. In contrast, the result of Bialek and Setayeshgar deviates markedly from our results. Parameters:  $k_a = 552\mu\text{M}^{-1}\text{s}^{-1}$ ;  $\sigma = 10\text{nm}$  and  $D = 1\mu\text{m}^2\text{s}^{-1}$ , such that  $k_D = 75\mu\text{M}^{-1}\text{s}^{-1}$ . The occupancy  $\bar{n}$  is varied by changing  $k_d$ .

## SUPPORTING REFERENCES

- 
- [1] Agmon, N., and Szabo, A. (1990). Theory of reversible diffusion-influenced reactions. *J. Chem. Phys.* 92, 5270-5284.
  - [2] Rice, S. A., (1985). Diffusion-limited reactions. Elsevier, Amsterdam.
  - [3] Popov, A. V., and Agmon, N. (2001). Three-dimensional simulations of reversible bimolecular reactions: The simple target problem. *J. Chem. Phys.* 115, 8921-8932.
  - [4] Gopich, I. V., and Szabo, A. (2002). Kinetics of reversible diffusion influenced reactions: The self-consistent relaxation time approximation. *J. Chem. Phys.* 117, 507-517.
